# Supplementary material for: Is It Possible to Find Needles in a Haystack? Meta-Analysis of 1000+ MS/MS Files Provided by the Russian Proteomic Consortium for Mining Missing Proteins
Source: MDPI journal article supplement (doi:10.3390/proteomes8020012), 2020-05-23

# **Meta-analysis of Chr18 Consortium MS-data for missing proteins mining: is it possible to find needles in a haystack?**

Ekaterina V. Poverennaya<sup>1\*</sup>, Olga I. Kiseleva<sup>1</sup>, Ekaterina V. Ilgisonis<sup>1</sup>, Svetlana E. Novikova<sup>1</sup>, Arthur T. Kopylov<sup>1</sup>, Yuri D. Ivanov<sup>1</sup>, Alexei S. Kononikhin<sup>2,3</sup>, Mikhail V. Gorshkov<sup>4,5</sup>, Nikolai E. Kushlinskii<sup>6</sup>, Alexander I. Archakov<sup>1</sup>, Elena A. Ponomarenko<sup>1</sup>

1 - Institute of Biomedical Chemistry, Moscow, Russia

2 - Skolkovo Institute of Science and Technology, Skolkovo, Russia

3 - V.I. Kulakov National Medical Research Center of Obstetrics, Gynecology and Perinatology, Moscow, Russia

4 - V.L. Talrose Institute for Energy Problems of Chemical Physics, Russian Academy of Sciences, Moscow, Russia

5 - Moscow Institute of Physics and Technology (State University), Dolgoprudny, Russia

6 - “N.N. Blokhin National Medical Research Centre of Oncology” of the Health Ministry of Russia, Moscow, Russia

\* k.poverennaya@gmail.com

## **Supplementary Note 1.**

### **Mass-spectra of peptides, which were used for protein identification (with 2 peptides):**

1. A0A087WSY6 (PE3) – p. S1
2. P22532 (PE2) – p. S2
3. Q9BYX7 (PE5) – p. S3
4. Q9BZK3(PE5) – p. S4
5. Q58FF3 (PE5) – p. S5
6. Q58FG1(PE5) – p. S6
7. Q9H893(PE5) – p. S7

NH<sub>2</sub>-A S S Q S V S S N L A W Y Q Q K P G Q A P R-COOH

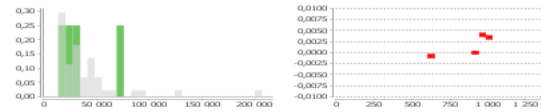

AC:  
**A0A087WSY6**

*Protein existence:*  
**PE3**

*Protein name:*  
**Immunoglobulin kappa  
variable 3D-15**

*Gene name:*  
**IGKV3D-15**

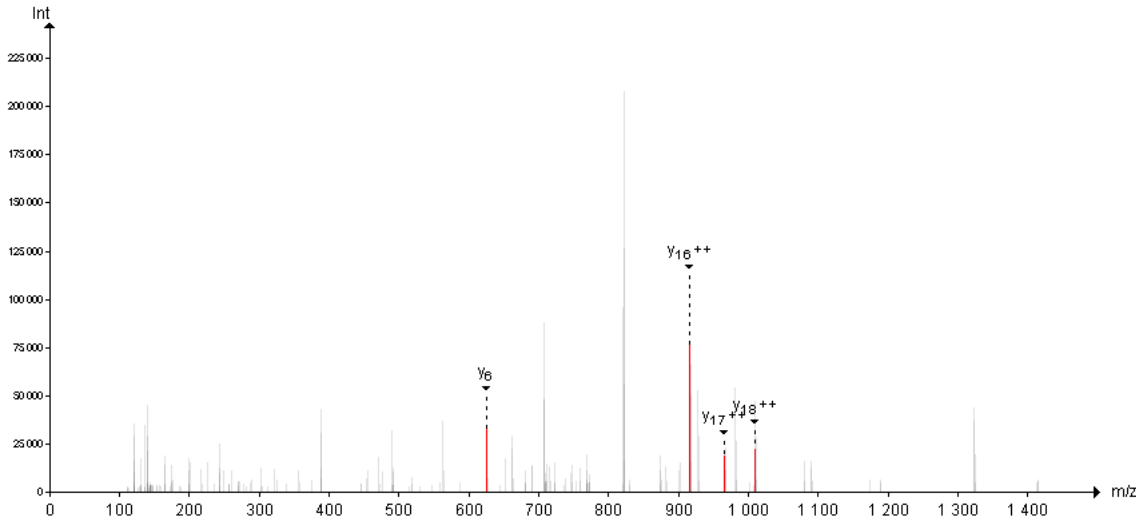

NH<sub>2</sub>-L L I Y G A S I R-COOH

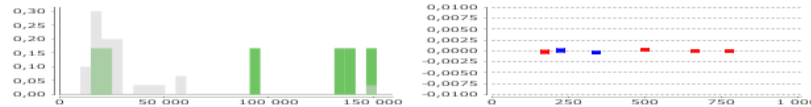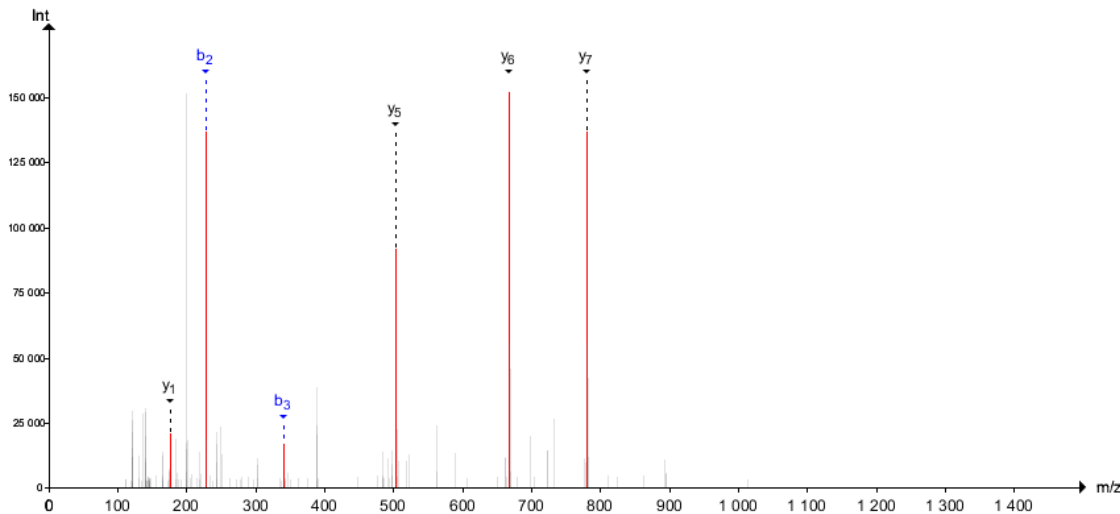

*Gene name:*  
**SPRR2D**

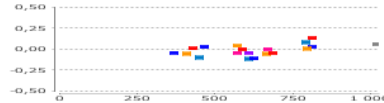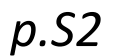

NH<sub>2</sub>-G M L T L K Y P W E H G I I T N W D D E K-COOH

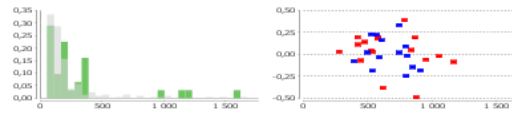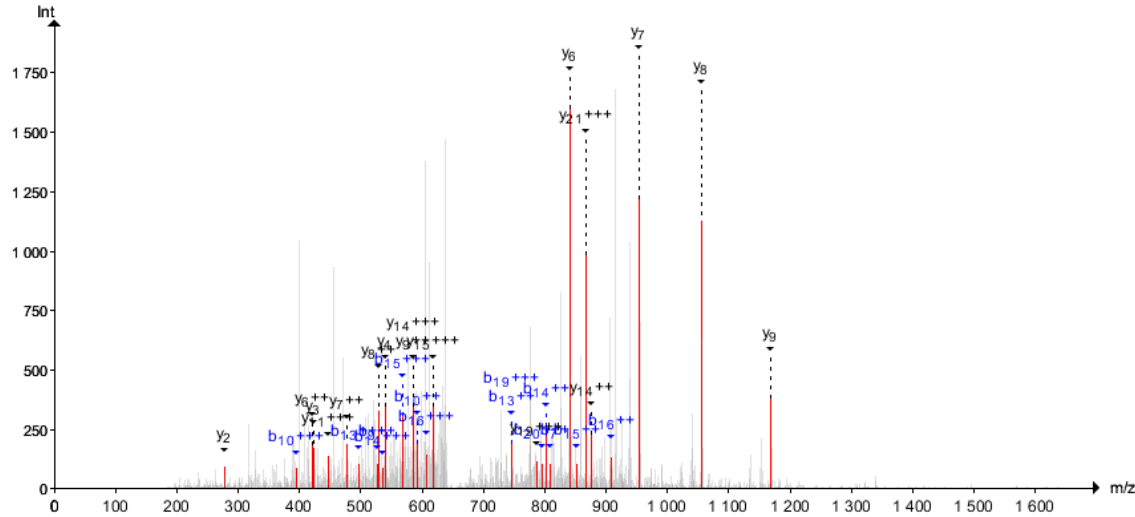

NH<sub>2</sub>-G M L T L K Y P W E H G I I T N W D D M E K-COOH

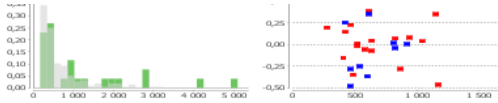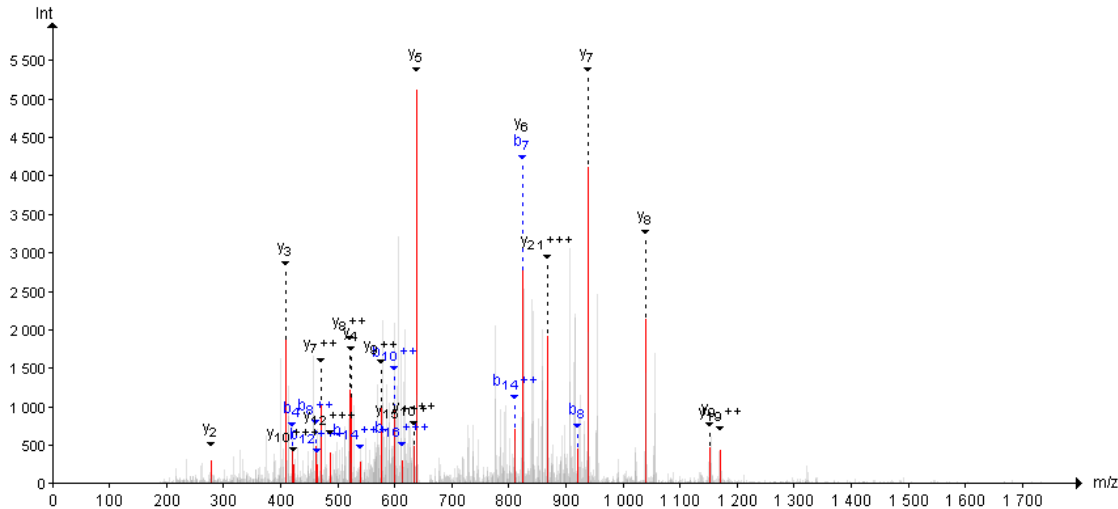

AC:  
Q9BYX7

*Protein existence:*  
**PE5**

*Protein name:*  
**Putative beta-a  
ctin-like protein 3**

*Gene name:*  
**POTEKP**

AC:  
**Q9BZK3**

Protein existence:  
**PE5**

Protein name:

**Putative nascent polypeptide- associated complex subunit alpha-like protein**

Gene name:

**NACA4P**

NH<sub>2</sub>-I E D L S Q E A Q L A A A E K-COOH

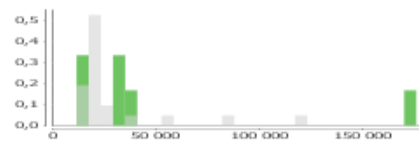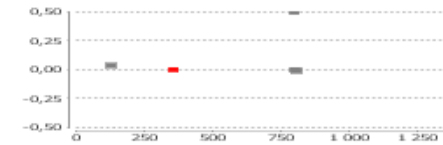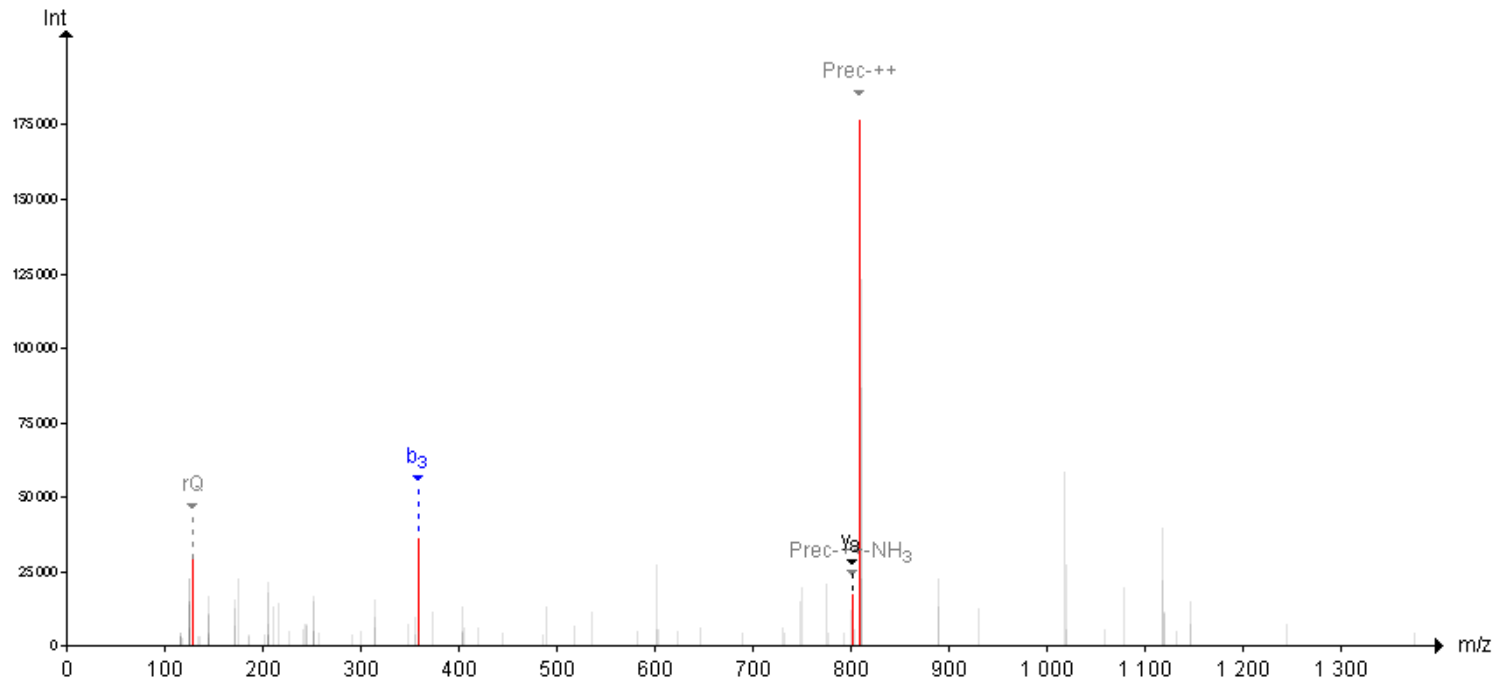

AC:  
Q58FF3

Protein name:  
**Putative endoplasmin-like protein**

Protein existence:  
**PE5**

Gene name:  
**NACA4P**

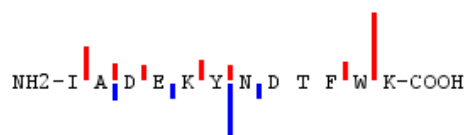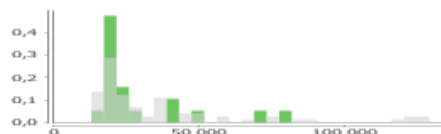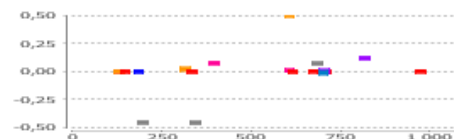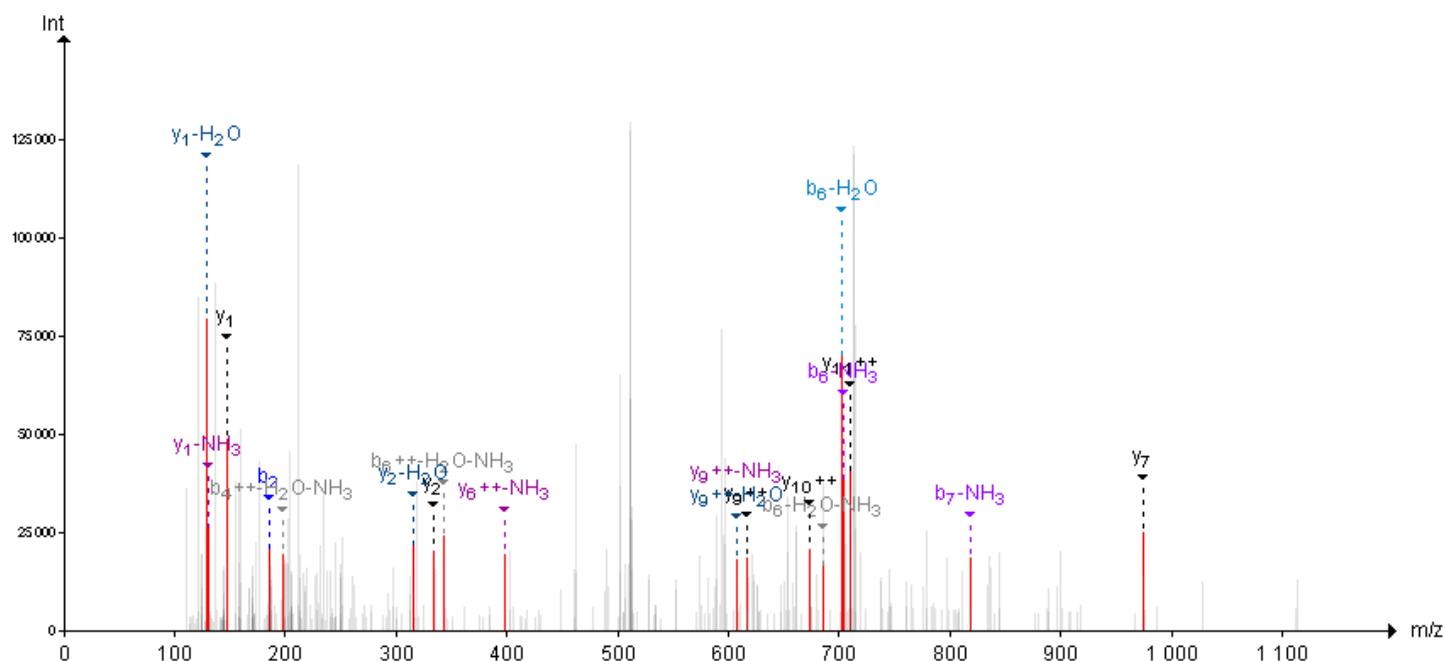

AC:  
**Q58FG1**

*Protein name:*  
**Putative heat shock protein HSP 90-alpha A4**

*Protein existence:*  
**PE5**

*Gene name:*  
**HSP90AA4P**

pyro-E D L E L P E D E E E K K-COOH

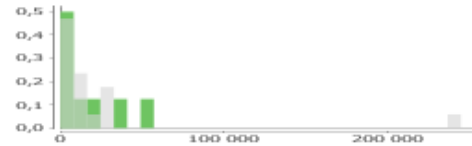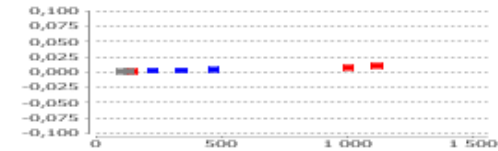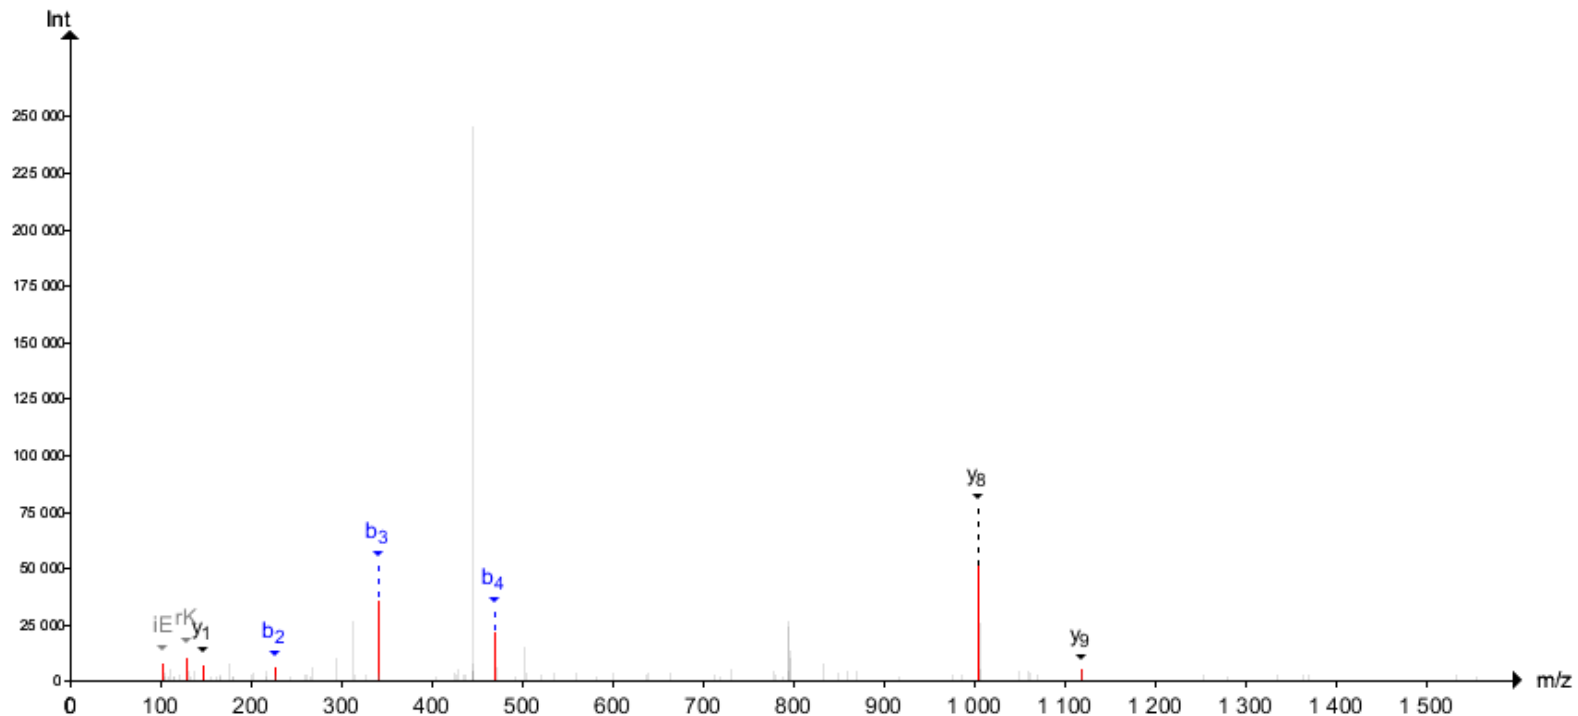

AC:  
Q9H853

Protein name:  
Putative tubulin-like protein alpha-4B

Protein existence:  
PE5

Gene name:  
TUBA4B

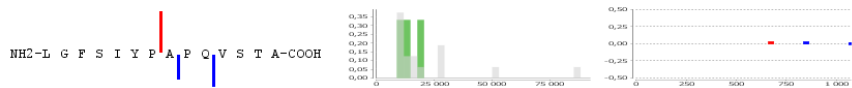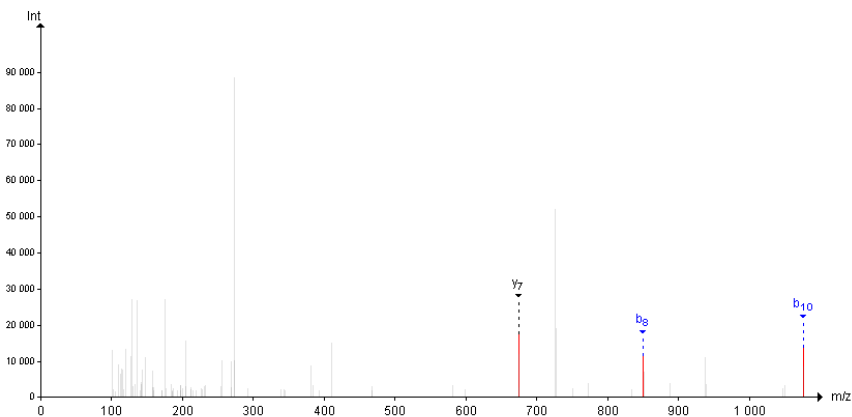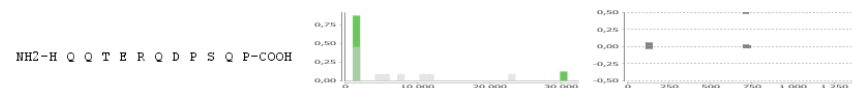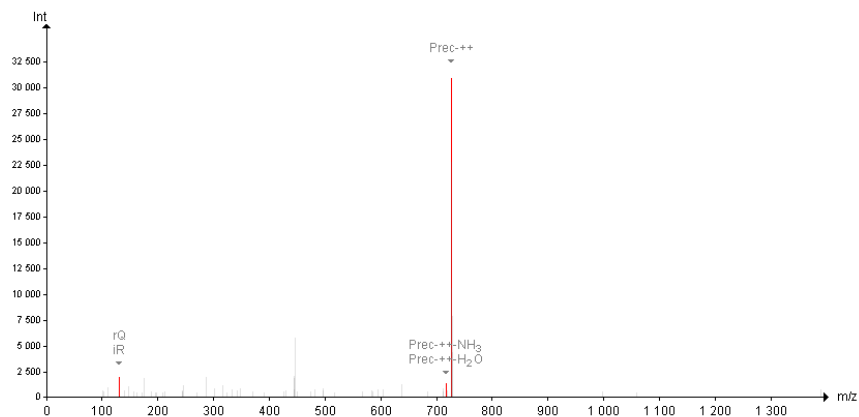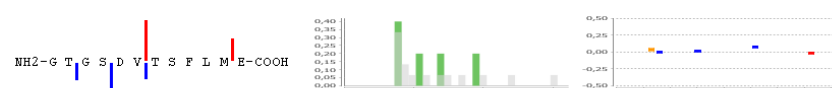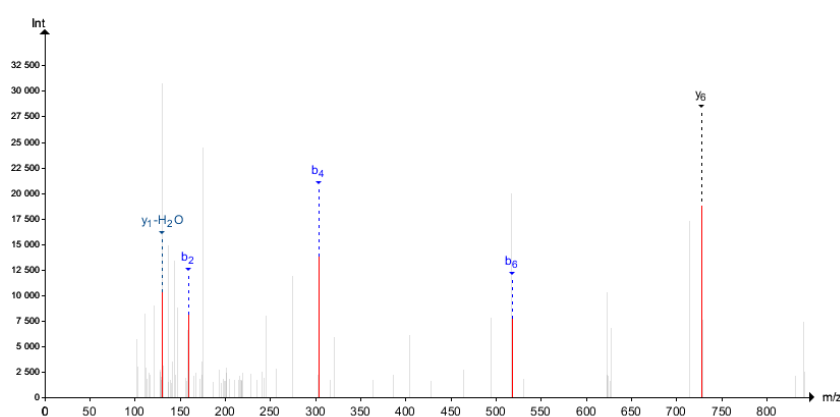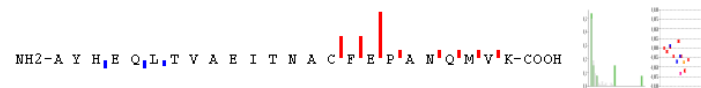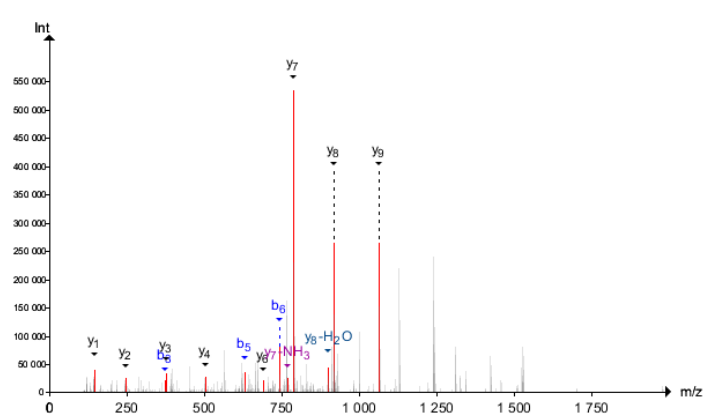

Supplement: s1 [file s1]
