# Supplementary material for: Is It Possible to Find Needles in a Haystack? Meta-Analysis of 1000+ MS/MS Files Provided by the Russian Proteomic Consortium for Mining Missing Proteins
Source: Proteomes. 2020 May 23;8(2):12. doi: 10.3390/proteomes8020012 (PMC7356824; doi:10.3390/proteomes8020012)
Supplement: Supplementary file 1 [file proteomes-08-00012-s001.zip]

Archive with 8 entries (7 files):
- suppl/
- __MACOSX/._suppl
- suppl/suppl_table2.xlsx
- __MACOSX/suppl/._suppl_table2.xlsx
- suppl/suppl_note1.pdf
- __MACOSX/suppl/._suppl_note1.pdf
- suppl/suppl_table1.xlsx
- __MACOSX/suppl/._suppl_table1.xlsx
