# Supplementary material for: Is It Possible to Find Needles in a Haystack? Meta-Analysis of 1000+ MS/MS Files Provided by the Russian Proteomic Consortium for Mining Missing Proteins
Source: Proteomes. 2020 May 23;8(2):12. doi: 10.3390/proteomes8020012 (PMC7356824; doi:10.3390/proteomes8020012)
Supplement: Supplementary file 1 [file proteomes-08-00012-s001.zip › suppl/suppl_table1.xlsx]

## Sheet: List1_ Non detectable
List of undetectable proteins according to in silico proteolysis, identified as missing and uncertain proteins (by one peptide)
AC	Protein name	Gene name	Number of unique peptides						Protein existance
			ArgC	AspN	GluC	LysC	LysN	Try
A0A087WVF3	TBC1 domain family member 3D	TBC1D3D	0	0	0	0	0	0	PE2
A0A087X179	TBC1 domain family member 3E	TBC1D3E	1	0	0	1	1	0	PE2
A0A0B4J2A2	Peptidyl-prolyl cis-trans isomerase A-like 4C	PPIAL4C	0	0	0	0	0	0	PE2
A0A0U1RR11	Centromere protein V-like protein 1	CENPVL1	0	0	0	0	0	0	PE2
A0A1B0GUQ0	Protein FAM236A	FAM236A	0	0	0	0	0	0	PE2
A0A1B0GV22	Protein FAM236B	FAM236B	0	0	0	0	0	0	PE2
A4D0T7	Small integral membrane protein 30	SMIM30	0	0	1	0	0	0	PE2
A6NER0	TBC1 domain family member 3F	TBC1D3F	1	0	0	0	0	1	PE2
A8MQT2	Golgin subfamily A member 8B	GOLGA8B	1	0	0	0	0	0	PE2
A8MWP6	Uncharacterized protein ENSP00000382042		0	1	0	0	0	0	PE2
A8MWV9	Small integral membrane protein 34A	SMIM34A	0	0	0	0	0	0	PE2
A8MXK9	Uncharacterized protein ENSP00000382033		0	1	0	0	0	0	PE2
B2RN74	Olfactory receptor 11H12	OR11H12	0	0	1	0	0	0	PE2
B9A014	Protein FAM243A	FAM243A	0	0	0	0	0	0	PE2
B9A6J9	TBC1 domain family member 3L	TBC1D3L	1	0	1	1	1	1	PE2
E9PI22	Proline-rich protein 23D1	PRR23D1	0	0	0	0	0	0	PE2
E9PQR5	Nuclear pore complex-interacting protein family member B8	NPIPB8	0	0	0	0	0	1	PE2
O15342	V-type proton ATPase subunit e 1	ATP6V0E1	0	0	1	1	1	0	PE2
O43374	Ras GTPase-activating protein 4	RASA4	0	0	1	1	1	0	PE2
O76087	G antigen 7	GAGE7	0	0	0	0	0	0	PE2
P0C7X1	TBC1 domain family member 3H	TBC1D3H	0	0	0	0	0	0	PE2
P0CG41	cTAGE family member 8	CTAGE8	0	0	0	0	0	0	PE2
P0CH99	Zinc finger protein 705D	ZNF705D	0	1	0	0	0	0	PE2
P0CJ68	Humanin-like 1	MTRNR2L1	0	1	1	1	1	0	PE2
P0CJ69	Humanin-like 2	MTRNR2L2	1	1	1	0	0	0	PE2
P0CJ75	Humanin-like 8	MTRNR2L8	0	1	1	1	1	0	PE2
P0CL85	STAG3-like protein 3	STAG3L3	1	1	0	0	0	0	PE2
P0CV99	Testis-specific Y-encoded protein 4	TSPY4	0	0	0	0	0	0	PE2
P0DMB1	Proline-rich protein 23D2	PRR23D2	0	0	0	0	0	0	PE2
P0DMU7	Cancer/testis antigen family 45 member A6	CT45A6	0	0	0	0	0	0	PE2
P0DMU8	Cancer/testis antigen family 45 member A5	CT45A5	0	0	0	0	0	0	PE2
P0DMW4	Small integral membrane protein 10-like protein 2A	SMIM10L2A	0	0	0	0	0	0	PE2
P0DMW5	Small integral membrane protein 10-like protein 2B	SMIM10L2B	0	0	0	0	0	0	PE2
P0DN84	Sarcoplasmic/endoplasmic reticulum calcium ATPase regulator DWORF		0	0	0	0	0	0	PE2
P0DP73	Beta-defensin 130B	DEFB130B	0	0	0	0	0	0	PE2
P0DP74	Beta-defensin 130A	DEFB130A	0	0	0	0	0	0	PE2
P0DPE8	Small integral membrane protein 34B	SMIM34B	0	0	0	0	0	0	PE2
P0DPF5	Uncharacterized protein C2orf27A	C2orf27A	1	0	1	0	0	1	PE2
P35325	Small proline-rich protein 2B	SPRR2B	0	0	0	1	1	0	PE2
P86496	Proline-rich protein 20A	PRR20A	0	0	0	0	0	0	PE2
Q08AI6	Putative sodium-coupled neutral amino acid transporter 11	SLC38A11	1	1	0	0	0	1	PE2
Q3C1V0	Membrane-spanning 4-domains subfamily A member 18	MS4A18	0	1	1	0	0	0	PE2
Q3LI58	Keratin-associated protein 21-1	KRTAP21-1	0	0	0	0	0	0	PE2
Q495N2	Proton-coupled amino acid transporter 3	SLC36A3	0	0	0	0	0	0	PE2
Q4V326	G antigen 2E	GAGE2E	0	1	0	0	0	0	PE2
Q5DID0	Uromodulin-like 1	UMODL1	0	0	0	0	0	0	PE2
Q5DJT8	Cancer/testis antigen family 45 member A2	CT45A2	0	0	0	0	0	0	PE2
Q5GAN6	Inactive ribonuclease-like protein 10	RNASE10	0	1	0	0	0	1	PE2
Q5HYN5	Cancer/testis antigen family 45 member A1	CT45A1	0	0	0	1	1	0	PE2
Q5VWM5	PRAME family member 9/15	PRAMEF9	0	0	0	0	0	0	PE2
Q6IF00	Olfactory receptor 2T2	OR2T2	0	0	0	0	0	0	PE2
Q6IPX1	TBC1 domain family member 3C	TBC1D3C	0	0	0	0	0	0	PE2
Q6L8G8	Keratin-associated protein 5-7	KRTAP5-7	0	0	0	1	0	0	PE2
Q6L9T8	Protein FAM72D	FAM72D	0	0	0	0	0	1	PE2
Q6Q8B3	Cell surface glycoprotein CD200 receptor 2	CD200R1L	0	0	1	0	1	1	PE2
Q6QAJ8	Transmembrane protein 220	TMEM220	0	0	1	0	0	0	PE2
Q6UY09	Carcinoembryonic antigen-related cell adhesion molecule 20	CEACAM20	1	0	1	1	1	1	PE2
Q6ZRR5	TLC domain-containing protein 5	TMEM136	0	0	0	0	0	0	PE2
Q86Y27	B melanoma antigen 5	BAGE5	0	0	0	0	0	0	PE2
Q8IUB9	Keratin-associated protein 19-1	KRTAP19-1	1	0	0	0	0	0	PE2
Q8IX94	cTAGE family member 4	CTAGE4	0	0	0	0	0	0	PE2
Q8N7P3	Claudin-22	CLDN22	0	1	1	0	0	0	PE2
Q8N7U7	Tetra-peptide repeat homeobox protein 1	TPRX1	0	0	0	0	0	0	PE2
Q8N9I5	Fatty acid desaturase 6	FADS6	1	1	1	0	0	1	PE2
Q8NGA8	Olfactory receptor 4F17	OR4F17	0	0	0	0	0	0	PE2
Q8NGX1	Olfactory receptor 2T34	OR2T34	0	0	0	0	0	0	PE2
Q8NH03	Olfactory receptor 2T3	OR2T3	0	0	0	0	0	0	PE2
Q8WXT5	Forkhead box protein D4-like 4	FOXD4L4	1	0	0	0	0	0	PE2
Q96DZ7	Transmembrane 4 L6 family member 19	TM4SF19	1	0	0	0	0	0	PE2
Q96JQ5	Membrane-spanning 4-domains subfamily A member 4A	MS4A4A	0	0	0	0	0	0	PE2
Q96PT3	Double homeobox protein 5	DUX5	1	0	1	1	1	1	PE2
Q96PT4	Putative double homeobox protein 3	DUX3	1	0	0	1	1	1	PE2
Q96R45	Olfactory receptor 2A7	OR2A7	1	0	1	0	0	1	PE2
Q99218	Amelogenin, Y isoform	AMELY	1	0	1	0	0	0	PE2
Q9BYG7	Protein maestro	MRO	0	0	0	0	0	0	PE2
Q9BYT5	Keratin-associated protein 2-2	KRTAP2-2	0	0	0	0	0	0	PE2
Q9GZW8	Membrane-spanning 4-domains subfamily A member 7	MS4A7	0	0	0	0	0	0	PE2
Q9H320	Variable charge X-linked protein 1	VCX	0	0	1	0	0	0	PE2
Q9H321	Variable charge X-linked protein 3B	VCX3B	0	0	0	0	0	0	PE2
Q9HC47	Cutaneous T-cell lymphoma-associated antigen 1	CTAGE1	0	0	0	0	0	0	PE2
Q9NNX9	Variable charge X-linked protein 3	VCX3A	0	0	0	0	0	0	PE2
Q9UND3	Nuclear pore complex-interacting protein family member A1	NPIPA1	0	0	1	1	1	1	PE2
Q9Y5F9	Protocadherin gamma-B6	PCDHGB6	0	1	1	0	0	0	PE2
A0A075B759	Peptidyl-prolyl cis-trans isomerase A-like 4E	PPIAL4E	0	0	0	0	0	0	PE3
A0A075B767	Peptidyl-prolyl cis-trans isomerase A-like 4H	PPIAL4H	1	1	0	0	0	1	PE3
A0A087X1G2	TBC1 domain family member 3K	TBC1D3K	0	0	0	0	0	0	PE3
A0A0C4DH41	Immunoglobulin heavy variable 4-61	IGHV4-61	0	0	1	1	1	1	PE3
A0A1B0GTK5	Protein FAM236D	FAM236D	0	0	0	0	0	0	PE3
A0A1B0GVZ6	Methyl-CpG-binding domain protein 3-like 2B	MBD3L2B	0	0	0	0	1	0	PE3
A0A589	T cell receptor beta variable 4-3	TRBV4-3	0	0	0	1	1	0	PE3
A6NHP3	Speedy protein E2B	SPDYE2B	0	0	0	0	0	0	PE3
A6NI86	Golgin subfamily A member 6-like protein 10	GOLGA6L10	0	0	0	0	0	0	PE3
C9JPN9	Ubiquitin carboxyl-terminal hydrolase 17-like protein 12	USP17L12	0	0	0	0	0	0	PE3
C9JVI0	Ubiquitin carboxyl-terminal hydrolase 17-like protein 11	USP17L11	0	0	0	0	0	0	PE3
D6R901	Ubiquitin carboxyl-terminal hydrolase 17-like protein 21	USP17L21	0	0	0	0	0	0	PE3
D6R9N7	Ubiquitin carboxyl-terminal hydrolase 17-like protein 18	USP17L18	0	0	0	0	0	0	PE3
D6RA61	Ubiquitin carboxyl-terminal hydrolase 17-like protein 22	USP17L22	0	0	0	0	0	0	PE3
D6RBQ6	Ubiquitin carboxyl-terminal hydrolase 17-like protein 17	USP17L17	0	0	0	0	0	0	PE3
D6RCP7	Ubiquitin carboxyl-terminal hydrolase 17-like protein 19	USP17L19	0	0	0	0	0	0	PE3
D6RJB6	Ubiquitin carboxyl-terminal hydrolase 17-like protein 20	USP17L20	0	0	0	0	0	0	PE3
F8WFD2	Nuclear pore complex-interacting protein family member A3	NPIPA3	0	0	0	0	0	0	PE3
H0Y354	Protein FAM72C	FAM72C	0	0	0	0	0	1	PE3
P0CJ85	Double homeobox protein 4-like protein 2	DUX4L2	0	0	0	0	0	0	PE3
P0CJ86	Double homeobox protein 4-like protein 3	DUX4L3	0	0	0	0	0	0	PE3
P0CJ87	Double homeobox protein 4-like protein 4	DUX4L4	0	0	0	0	0	0	PE3
P0CJ88	Double homeobox protein 4-like protein 5	DUX4L5	0	0	0	0	0	0	PE3
P0CJ89	Double homeobox protein 4-like protein 6	DUX4L6	0	0	0	0	0	0	PE3
P0CJ90	Double homeobox protein 4-like protein 7	DUX4L7	0	0	0	0	0	0	PE3
P0CL81	G antigen 12G	GAGE12G	0	0	0	0	0	0	PE3
P0CV98	Testis-specific Y-encoded protein 3	TSPY3	0	0	0	0	0	0	PE3
P0CW01	Testis-specific Y-encoded protein 10	TSPY10	0	0	0	0	0	0	PE3
P0DMV0	Cancer/testis antigen family 45 member A7	CT45A7	0	0	0	0	0	0	PE3
P0DMV1	Cancer/testis antigen family 45 member A8	CT45A8	0	0	0	0	0	0	PE3
P0DMV2	Cancer/testis antigen family 45 member A9	CT45A9	0	0	0	0	0	0	PE3
P0DN26	Peptidyl-prolyl cis-trans isomerase A-like 4F	PPIAL4F	0	0	0	0	0	0	PE3
P0DN77	Medium-wave-sensitive opsin 2	OPN1MW2	0	0	0	0	0	0	PE3
P0DN78	Medium-wave-sensitive opsin 3	OPN1MW3	0	0	0	0	0	0	PE3
P0DP06	Immunoglobulin heavy variable 4-30-4	IGHV4-30-4	0	0	0	1	1	1	PE3
P0DP71	Protein FAM236C	FAM236C	0	0	0	0	0	0	PE3
P0DPI3	Centromere protein V-like protein 2	CENPVL2	0	0	0	0	0	0	PE3
P0DPQ4	Protein FAM243B	FAM243B	0	0	0	0	0	0	PE3
P63119	Endogenous retrovirus group K member 21 Pro protein	ERVK-21	0	0	0	0	0	1	PE3
P63121	Endogenous retrovirus group K member 113 Pro protein	HERVK_113	0	0	0	0	0	1	PE3
P63122	Endogenous retrovirus group K member 8 Pro protein	ERVK-8	0	0	0	0	0	0	PE3
P63124	Endogenous retrovirus group K member 104 Pro protein	HERV-K104	0	1	1	1	1	1	PE3
P63125	Endogenous retrovirus group K member 25 Pro protein	ERVK-25	0	0	0	0	0	0	PE3
P63127	Endogenous retrovirus group K member 9 Pro protein	ERVK-9	0	0	0	0	0	0	PE3
P63129	Endogenous retrovirus group K member 24 Pro protein	ERVK-24	0	0	0	0	0	0	PE3
P63131	Endogenous retrovirus group K member 7 Pro protein	ERVK-7	0	0	0	0	0	0	PE3
P86481	Proline-rich protein 20B	PRR20B	0	0	0	0	0	0	PE3
Q3LHN0	Keratin-associated protein 25-1	KRTAP25-1	1	1	0	0	0	1	PE3
Q3LI59	Keratin-associated protein 21-2	KRTAP21-2	0	0	0	0	0	0	PE3
Q3LI63	Keratin-associated protein 20-1	KRTAP20-1	1	0	0	0	0	1	PE3
Q3LI68	Keratin-associated protein 22-2	KRTAP22-2	0	1	1	0	0	0	PE3
Q3MIV0	Keratin-associated protein 22-1	KRTAP22-1	0	0	0	1	1	1	PE3
Q5VV16	Forkhead box protein D4-like 5	FOXD4L5	1	0	0	0	0	1	PE3
Q7Z4W3	Keratin-associated protein 19-3	KRTAP19-3	1	0	0	0	0	0	PE3
Q8N109	Killer cell immunoglobulin-like receptor 2DL5A	KIR2DL5A	0	1	1	0	0	0	PE3
Q8NG94	Olfactory receptor 11H1	OR11H1	0	0	0	1	1	1	PE3
Q8NGG8	Olfactory receptor 8B3	OR8B3	0	0	0	0	0	0	PE3
Q8NGX2	Olfactory receptor 2T35	OR2T35	0	0	0	0	0	0	PE3
Q8NH07	Olfactory receptor 11H2	OR11H2	0	1	1	1	1	0	PE3
Q8NH10	Olfactory receptor 8U1	OR8U1	0	0	0	0	0	0	PE3
Q8NH21	Olfactory receptor 4F5	OR4F5	0	0	0	0	0	0	PE3
P0DOY5	Immunoglobulin heavy diversity 1-1	IGHD1-1	0	0	0	0	0	0	PE4
P0DPI4	T cell receptor beta diversity 1	TRBD1	0	0	0	0	0	0	PE4
Q5SQ80	Ankyrin repeat domain-containing protein 20A2	ANKRD20A2	1	0	0	0	0	0	PE4
Q6UWF5	Putative uncharacterized protein UNQ5815/PRO19632	UNQ5815/PRO19632	0	0	0	1	1	1	PE4
Q96PS6	Putative uncharacterized protein GAFA-1	GAFA1	0	1	0	0	0	1	PE4
A0A087WX78	Putative elongin-A3 member C	ELOA3C	0	1	1	0	0	0	PE5
A6NDX4	Putative transmembrane protein ENSP00000320207		1	0	0	0	0	1	PE5
A6NDZ8	Putative methyl-CpG-binding domain protein 3-like 4	MBD3L4	0	0	0	0	0	0	PE5
A6NE82	Putative methyl-CpG-binding domain protein 3-like 3	MBD3L3	0	0	0	0	0	0	PE5
A6NEW6	Putative protein FAM90A16P/FAM90A17P	FAM90A16P	0	0	0	0	0	0	PE5
A6NJY4	Putative transmembrane protein LOC100289255		0	1	0	0	0	0	PE5
A6NM45	Putative claudin-24	CLDN24	0	0	0	0	0	0	PE5
A8MXZ1	Putative protein FAM90A23P	FAM90A23P	0	0	0	0	0	0	PE5
B5MD39	Putative glutathione hydrolase light chain 3	GGTLC3	0	0	1	0	0	0	PE5
H0YKK7	Putative golgin subfamily A member 6-like protein 19	GOLGA6L19	0	1	0	0	0	0	PE5
O15225	Putative inactivation escape 1 protein	INE1	0	0	0	0	0	0	PE5
O96002	Putative transmembrane protein CXorf1	CXorf1	1	0	1	1	1	1	PE5
P0C7V4	Putative protein FAM90A15P	FAM90A15P	0	0	0	0	0	0	PE5
P0C7W8	Putative protein FAM90A13P	FAM90A13P	0	0	0	0	0	0	PE5
P0CH98	Protein FAM106C	FAM106C	0	0	0	0	0	0	PE5
P0CL84	Putative STAG3-like protein 2	STAG3L2	0	1	0	1	1	0	PE5
Q0D2H9	Putative golgin subfamily A member 8D	GOLGA8DP	1	0	1	0	0	0	PE5
Q5T6R2	Putative phosphatidylinositol 3,4,5-trisphosphate 3-phosphatase TPTE2P1	TPTE2P1	0	0	0	0	0	0	PE5
Q6UXR8	Putative uncharacterized protein UNQ6493/PRO21345	UNQ6493/PRO21345	0	0	0	1	1	0	PE5
Q6W349	Putative uncharacterized protein encoded by LINC00575	LINC00575	1	1	0	0	0	1	PE5
Q6ZTU2	Putative EP400-like protein	EP400P1	0	1	0	0	0	0	PE5
Q8N616	Putative uncharacterized protein encoded by LINC00311	LINC00311	1	1	1	0	0	0	PE5
Q8N9W7	Putative transmembrane protein FLJ36131		1	0	0	0	0	1	PE5
Q9BZ97	Putative transcript Y 13 protein	TTTY13	0	1	0	0	0	0	PE5

## Sheet: List2_MP+PE5
List of identified ”missing” and uncertain proteins by one peptide
AC	Protein name	Gene name	Protein existence	Number of theoretical unique peptides	Number of theoretical peptides observed in GPMdb	Number of experiments in GPMdb where unique peptide was detected	Number of protein observations in our data	Type of biomaterial/conditions	Detected peptides in our data	Specificity of peptide
A0AVI2	Fer-1-like protein 5	FER1L5	PE2	207	28	1, 15, 0	1, 2 (one type of biomaterial), 1	cardiovascular diseases, colon cancer, intraocular fluid	ERFIGLATVLLKPLLK, RLLLDIDINK, WLGLCQPNNPGSGVTGYLK	proteoform-specific
A0PJE2	Dehydrogenase/reductase SDR family member 12	DHRS12	PE2	31	9	0	1	cardiovascular diseases	VVGEAQTASPLPRFLEIMMHEGK	proteoform-specific
A4D1E1	Zinc finger protein 804B	ZNF804B	PE2	130	42	0	2 (one type of biomaterial), 1	cardiovascular diseases, child urine	RCLFGNQVLQTSSDLSNANHR, TMIANPDWEK	proteoform-specific
A4QPB2	Low-density lipoprotein receptor-related protein 5-like protein	LRP5L	PE2	22	2	16	5 (one type of biomaterial, 2DE)	liver tissue tissue	INDPDDIAVNWVAR	gene-specific
A6NCI4	von Willebrand factor A domain-containing protein 3A	VWA3A	PE2	118	17	0	1	prostate tissue tissue	DLIIHFITYR	proteoform-specific
A6NDY0	Embryonic polyadenylate-binding protein 2	PABPN1L	PE2	18	11	28	1	ovarian cancer	EILGPEGGEGK	gene-specific
A6NFE2	Single-pass membrane and coiled-coil domain-containing protein 2	SMCO2	PE2	39	10	0	2 (one type of biomaterial)	liver tissue tissue	GMFLKLNYWNTK	proteoform-specific
A6NGH8	Ankyrin repeat domain-containing protein 61	ANKRD61	PE2	38	14	2	2 (one type of biomaterial)	HepG2 cell line	LLGAGVSCIR	proteoform-specific
A6NIK2	Leucine-rich repeat-containing protein 10B	LRRC10B	PE2	47	28	0	1	urine	RPARAFEDEEEEDLLIGGAGSR	proteoform-specific
A6NJ46	Homeobox protein Nkx-6.3	NKX6-3	PE2	20	11	20, 8	1+1 (one type of biomaterial)	colon cancer	HRAAFSVLSLGAHSV, SALEPSSSTPRAPGGAGAGAGGDR	gene-specific
A6NKB5	Pecanex-like protein 2	PCNX2	PE2	132	25	0, 0	1.1	colon cancer, cervicovaginal fluid	NPSNNRQIHNGK, KHHPWMWISHPILK	proteoform-specific
A6NNA2	Serine/arginine repetitive matrix protein 3	SRRM3	PE2	58	23	1	1	melanoma	HWSSSSASPPPKK	proteoform-specific
A8K0S8	Putative homeobox protein Meis3-like 2	MEIS3P2	PE2	12	5	0	1	breast cancer	RMVQPMIDQSNR	proteoform-specific
A8MVX0	Rho guanine nucleotide exchange factor 33	ARHGEF33	PE2	86	3	2	1	Caco-2 cell line	LEAAAQAHGK	gene-specific
A9Z1Z3	Fer-1-like protein 4	FER1L4	PE2	153	6	30	2	cardiovascular diseases, glioblastoma	AEPEPPQAQQGSTLSR	gene-specific
F5GYI3	Ubiquitin-associated protein 1-like	UBAP1L	PE2	21	7	0	1	HepG2 cell line	LWEQFSDMGFQQDR	proteoform-specific
F8W1W9	Nuclear pore complex-interacting protein family member B9	NPIPB9	PE2	8	3	2	8 (one type of biomaterial)	ovarian cancer	MPMRVPEEVTLR	proteoform-specific
H3BQW9	Protein FAM229A	FAM229A	PE2	10	7	1	1	colon cancer	GLDMSAQEPPQGR	proteoform-specific
O00341	Excitatory amino acid transporter 5	SLC1A7	PE2	29	10	4	2 (one type of biomaterial)	Alzheimer's disease	MMILPLVVSSLMSGLASLDAK	gene-specific
O43345	Zinc finger protein 208	ZNF208	PE2	95	8	0	7 (one type of biomaterial)	Alzheimer's disease	CEECGKAFSWPSR	gene-specific
O95626	Acidic leucine-rich nuclear phosphoprotein 32 family member D	ANP32D	PE2	11	8	98	2 (one type of biomaterial)	liver tissue tissue	CPNLIHLNLSGNK	proteoform-specific
P0C7T8	Transmembrane protein 253	TMEM253	PE2	6	2	10, 9	1, 3 (one type of biomaterial)	colon cancer, liver tissue tissue	EQTRAALLPP, MEDRAGEQEQER	proteoform-specific
P0CG24	Zinc finger protein 883	ZNF883	PE2	44	21	1	2 (one type of biomaterial)	ovarian cancer	IHTRERPYQCTK	proteoform-specific
P0DP72	V-set and immunoglobulin domain-containing protein 10-like 2	VSIG10L2	PE2	37	2	0	1	colon cancer	VDPGTSGFMLHPEGAQLR	proteoform-specific
P34995	Prostaglandin E2 receptor EP1 subtype	PTGER1	PE2	20	14	25	3 (one type of biomaterial)	colon cancer	LALAAVAAVALAVALLPLAR	proteoform-specific
P35410	Mas-related G-protein coupled receptor MRG	MAS1L	PE2	16	1	0	2 (one type of biomaterial)	breast cancer	SLFLTYWKHVK	proteoform-specific
P58512	Uncharacterized protein encoded by LINC01547	LINC01547	PE2	22	8	2	1	colon cancer	RNVDNNPGCLCVPS	proteoform-specific
P60606	Cortexin-1	CTXN1	PE2	7	5	93	1	colon cancer	MPASSWTDHKEALER	proteoform-specific
P83859	Orexigenic neuropeptide QRFP	QRFP	PE2	15	7	0, 3	5 (4 in one type of biomaterial), 1	prostate tissue tissue, colon cancer	QDEGSEATGFLPAAGEK, TSGPLGNLAEELNGYSR	proteoform-specific
Q11128	Alpha-	FUT5	PE2	8	16	24	1	cardiovascular diseases	DDATGSPRPGLMAVEPVTGAPNGSR	proteoform-specific
Q12870	Transcription factor 15	TCF15	PE2	23	15	9	1	colon cancer	AAGSAKGAVPAAADGGR	proteoform-specific
Q16099	Glutamate receptor ionotropic, kainate 4	GRIK4	PE2	62	20	0	1	cervicovaginal fluid	DDKTATIIIHANASMSHTILLK	proteoform-specific
Q16280	Cyclic nucleotide-gated olfactory channel	CNGA2	PE2	56	21	0	1	colon cancer	FRGPELQTVTTQEGDGK	proteoform-specific
Q2VPJ9	Leucine-rich repeat-containing protein 75B	LRRC75B	PE2	19	2	3	1	HepG2 cell line	RAGPEAGSEAGAAAGCGPAPYER	gene-specific
Q3KNW1	Zinc finger protein SNAI3	SNAI3	PE2	39	15	0	1	HepG2 cell line	IEEALGASGLDALEVSEVDPRASR	proteoform-specific
Q3KRB8	Rho GTPase-activating protein 11B	ARHGAP11B	PE2	11	12	8	1	colon cancer	LVKLALLQHLR	proteoform-specific
Q5EBN2	Putative tripartite motif-containing protein 61	TRIM61	PE2	23	5	1	4 (one type of biomaterial)	intraocular fluids	MEFVTALADLRAEASCPICLDYLK	proteoform-specific
Q5H9K5	Zinc finger matrin-type protein 1	ZMAT1	PE2	54	1	0	1	glioblastoma	HLSSENNTADHQAGHK	gene-specific
Q5HY64	Putative protein FAM47C	FAM47C	PE2	78	46	0	1	chorion	TRMYSLRPEPPNTGVSHLCPEPPK	proteoform-specific
Q5M9Q1	NKAP-like protein	NKAPL	PE2	32	24	9	1	colon cancer	IGELGAPEVWGPSPK	proteoform-specific
Q5T5N4	Uncharacterized protein C6orf118	C6orf118	PE2	54	12	0	1	HL60 cell line	VLCYQEAGSR	proteoform-specific
Q5TA89	Transcription factor HES-5	HES5	PE2	18	6	0	1	melanoma	INSSIEQLK	proteoform-specific
Q5VVC0	Uncharacterized protein C1orf146	C1orf146	PE2	18	6	2	2 (one type of biomaterial)	colon cancer	ECLLSTEEIFLAK	proteoform-specific
Q5VWK0	Neuroblastoma breakpoint family member 6	NBPF6	PE2	4	2	0	1	cardiovascular diseases	LAFRFAGPHAESAEIPNTAER	gene-specific
Q6IEE8	Schlafen family member 12-like	SLFN12L	PE2	51	1	3	1	liver tissue	FLGVYDKGR	gene-specific
Q6P387	Uncharacterized protein C16orf46	C16orf46	PE2	43	5	1	2 (one type of biomaterial)	ovarian cancer	DGCVAYAYGLK	gene-specific
Q6PXP3	Solute carrier family 2, facilitated glucose transporter member 7	SLC2A7	PE2	27	16	21	12 (one type of biomaterial)	colon cancer	GDEATARQALR	proteoform-specific
Q6S9Z5	Zinc finger protein 474	ZNF474	PE2	36	9	0	1	colon cancer	VIHATQDALGEPGGALCL	proteoform-specific
Q6ZMV8	Putative zinc finger protein 730	ZNF730	PE2	39	15	0	1	colon cancer	LFCILSHLAQHKK	proteoform-specific
Q6ZNR0	Transmembrane protein 91	TMEM91	PE2	6	3	1	1	HepG2 cell line	GDIQGAGAASRR	proteoform-specific
Q6ZRR7	Leucine-rich repeat-containing protein 9	LRRC9	PE2	153	17	0	1	glioblastoma	EISGLEPCLQLK	gene-specific
Q6ZRT6	Proline-rich protein 23B	PRR23B	PE2	12	9	2	1	HL60 cell line	VPLDDVDLVLEPAPTSILR	proteoform-specific
Q6ZSI9	Calpain-12	CAPN12	PE2	50	14	0	2 (one type of biomaterial)	ovarian cancer	KEDGEFWMELR	proteoform-specific
Q6ZSN1	Putative uncharacterized protein FLJ45355		PE2	23	7	2	1	colon cancer	GVPPPPAIGVLIAR	proteoform-specific
Q6ZUA9	Maestro heat-like repeat family member 5	MROH5	PE2	130	37	0	2 (one type of biomaterial)	prostate tissue	LGAQGTGSQSLGVAISTR	proteoform-specific
Q6ZVT6	Uncharacterized protein C3orf67	C3orf67	PE2	53	5	0	1	HeLa cell line	CVNGTEMSALLIPESEEQGNK	gene-specific
Q6ZWK6	Transmembrane protease serine 11F	TMPRSS11F	PE2	41	12	3	1	kidney cancer	KDVYDGLITPGMLCAGFMEGK	proteoform-specific
Q7L0R7	RING finger protein 44	RNF44	PE2	17	6	2	1	prostate tissue	MPLQRLDNDVDLR	gene-specific
Q86SP6	Probable G-protein coupled receptor 149	GPR149	PE2	47	23	1	1	cardiovascular diseases	QNAYAVASDGKK	proteoform-specific
Q86UP9	LHFPL tetraspan subfamily member 3 protein	LHFPL3	PE2	10	3	10	1	Caco-2 cell line	QDSLMAEELK	proteoform-specific
Q86V71	Zinc finger protein 429	ZNF429	PE2	61	21	0	1	glioblastoma	CDECGKTFSISSTFTK	proteoform-specific
Q8IXR9	Uncharacterized protein C12orf56	C12orf56	PE2	66	7	0	1	cervicovaginal fluid	FLFPFHHTK	gene-specific
Q8IXS0	Protein FAM217A	FAM217A	PE2	49	15	1	1	colon cancer	NLPAGRDGAAGGK	proteoform-specific
Q8N119	Matrix metalloproteinase-21	MMP21	PE2	63	11	0	2 (one type of biomaterial)	cardiovascular diseases	MWSEVTPLDFR	proteoform-specific
Q8N1M1	Bestrophin-3	BEST3	PE2	48	1	14	4 (one type of biomaterial)	cervicovaginal fluid	NLQVSLLAVDEMHMSLPKMK	gene-specific
Q8N1X5	Uncharacterized protein FLJ37310		PE2	12	3	3	1	cardiovascular diseases	CGSDSTPPPPLPRR	proteoform-specific
Q8N326	Uncharacterized protein C10orf111	C10orf111	PE2	16	8	18, 1	1.2	glioblastoma, cardiovascular diseases	HMPMGNNAGNLEPEKR, NLDLLIYPWPELR	proteoform-specific
Q8N4B4	F-box only protein 39	FBXO39	PE2	47	14	18	9 (one type of biomaterial)	colon cancer	LARILLQEIPIR	proteoform-specific
Q8N7P7	Uncharacterized protein FLJ40521		PE2	44	6	5, 2	3, 5 (4 in one type of biomaterial)	melanoma, cardiovascular diseases, HepG2 cell line	LSPQTGIPR, NPGDDGCLLKQGPR	proteoform-specific
Q8N812	Uncharacterized protein C12orf76	C12orf76	PE2	11	9	7	1	HL60 cell line	CCLPCDLGQASRFIHTTVCSAIR	proteoform-specific
Q8N9C0	Immunoglobulin superfamily member 22	IGSF22	PE2	92	18	15	1	colon cancer	EPAEGDPPSGYILEMR	gene-specific
Q8NAV2	Uncharacterized protein C8orf58	C8orf58	PE2	38	2	42	1	colon cancer	IQRPPGDPGEEESTR	gene-specific
Q8NFD2	Ankyrin repeat and protein kinase domain-containing protein 1	ANKK1	PE2	60	32	17	1	intraocular fluids	QGIMSFLEGK	proteoform-specific
Q8NFN8	Probable G-protein coupled receptor 156	GPR156	PE2	49	1	34	3 (2 in one type of biomaterial)	colon cancer, glioblastoma	GDQVPMNPSQSLLPER	gene-specific
Q8NFQ6	BPI fold-containing family C protein	BPIFC	PE2	24	5	4	1	placenta	LALPESNRSNIEVLR	gene-specific
Q8NG84	Olfactory receptor 2AK2	OR2AK2	PE2	14	2	0	1	colon cancer	VLIVVFQMSSGKGQAK	proteoform-specific
Q8NG97	Olfactory receptor 2Z1	OR2Z1	PE2	6	0	0	4 (one type of biomaterial)	melanoma	MGDVNQSVASDFILVGLFSHSGSR	proteoform-specific
Q8NHE4	V-type proton ATPase subunit e 2	ATP6V0E2	PE2	1	1	38	1	cardiovascular diseases	DPDPQGLPGSWK	gene-specific
Q8TBE1	Protein cornichon homolog 3	CNIH3	PE2	5	3	1714	1	glioblastoma	SPIDQCNPVHAR	proteoform-specific
Q8TD47	40S ribosomal protein S4, Y isoform 2	RPS4Y2	PE2	19	14	5374	1	melanoma	ISNIFVIGNGNKPWISLPR	proteoform-specific
Q8TDI7	Transmembrane channel-like protein 2	TMC2	PE2	63	3	1	2 (one type of biomaterial)	ovarian cancer	DIESHFGSSVASYFIFLR	gene-specific
Q8WZ79	Deoxyribonuclease-2-beta	DNASE2B	PE2	38	3	0	1	Caco-2 cell line	SEQLMNDTKSVLGR	proteoform-specific
Q93098	Protein Wnt-8b	WNT8B	PE2	34	20	2	1	HeLa cell line	ELVHLEDSPDYCLENK	proteoform-specific
Q96CB5	Putative uncharacterized protein C8orf44	C8orf44	PE2	20	11	0	1	HepG2 cell line	GFWSLLFSNLGRF	proteoform-specific
Q96HZ4-2	Transcription cofactor HES-6	HES6	PE2	32	10	4	3 (one type of biomaterial)	liver tissue tissue	GSLPPTLGPR	proteoform-specific
Q96HZ4-3	Transcription cofactor HES-6	HES6	PE2	16	5	2	1	HepG2 cell line	LLLAGAEAK	proteoform-specific
Q96LL3	Uncharacterized protein C16orf92	C16orf92	PE2	11	3	3	1	colon cancer	NWVPSQLPPREIK	proteoform-specific
Q96M66	Putative uncharacterized protein FLJ32790		PE2	26	15	4	1	melanoma	DTGEPSALPVQGRAEGR	proteoform-specific
Q96M78	Putative uncharacterized protein encoded by FER1L6-AS2	FER1L6-AS2	PE2	10	1	1	1	colon cancer	EELHLLHFPNSPEENLRK	proteoform-specific
Q96Q91	Anion exchange protein 4	SLC4A9	PE2	60	2	0	1	melanoma	DYSLDYLPFR	gene-specific
Q9BXX2	Ankyrin repeat domain-containing protein 30B	ANKRD30B	PE2	145	15	0	2 (one type of biomaterial)	prostate tissue	GPEPPNPFSERVYTEK	gene-specific
Q9GZW8	Membrane-spanning 4-domains subfamily A member 7	MS4A7	PE2	4	2	24	1	virus treatment	MLLQSQTMGVSHSFTPK	gene-specific
Q9H3W5	Leucine-rich repeat neuronal protein 3	LRRN3	PE2	57	32	4	1	urine	FMEPDSLFCVDPPEFQGQNVR	proteoform-specific
Q9N2J8	HERV-H_2q24.1 provirus ancestral Env polyprotein		PE2	12	3	2	1	colon cancer	ELPVPLMTLTPQK	proteoform-specific
Q9NQ03	Transcriptional repressor scratch 2	SCRT2	PE2	21	19	2	2 (one type of biomaterial)	cardiovascular diseases	AYVSMPALAMHLLTHNLRHK	proteoform-specific
Q9NUZ1	Acyl-coenzyme A oxidase-like protein	ACOXL	PE2	62	3	3	1	virus treatment	LMPHLATALALTFVSR	gene-specific
Q9NYP8	Uncharacterized protein C21orf62	C21orf62	PE2	19	7	0	1	glioblastoma	SYSIENVTSIANNFPDFSYFR	proteoform-specific
Q9UKI9	POU domain, class 2, transcription factor 3	POU2F3	PE2	16	1	0	1	prostate tissue	MVNLESMHTDIK	proteoform-specific
Q9UQ74	Pregnancy-specific beta-1-glycoprotein 8	PSG8	PE2	15	3	0	1	melanoma	IPVSLAIGI	proteoform-specific
Q9Y5G5	Protocadherin gamma-A8	PCDHGA8	PE2	41	1	0	1	glioblastoma	VLENMPPGTR	gene-specific
Q9Y5I0	Protocadherin alpha-13	PCDHA13	PE2	24	1	8	6 (one type of biomaterial)	glioblastoma	EDTQPSAIIALISVSDR	gene-specific
Q9Y5K1	Meiotic recombination protein SPO11	SPO11	PE2	45	1	389	1	colon cancer	SLHILSTSKGLIAGNLR	gene-specific
Q9Y5P1	Olfactory receptor 51B2	OR51B2	PE2	13	10	2	1	colon cancer	YASILTNTRVIALGVGVFLR	proteoform-specific
Q9Y5Y3	Probable G-protein coupled receptor 45	GPR45	PE2	17	4	0	1	colon cancer	EACIELLPQTFQILPK	proteoform-specific
A0A075B6N3	T cell receptor beta variable 24-1	TRBV24-1	PE3	11	6	11	1	ovarian cancer	QDPGLGLQLIYYSFDVK	proteoform-specific
A0A087WSY6	Immunoglobulin kappa variable 3D-15	IGKV3D-15	PE3	2	1	5777	50	ovarian cancer, breast cancer, colon cancer, introcilar fluid	LLIYGASIR	proteoform-specific
A0A0A0MT36	Immunoglobulin kappa variable 6D-21	IGKV6D-21	PE3	3	1	6126	5	ovarian cancer, breast cancer	YASQSISGVPSR	proteoform-specific
A0A1B0GTW7	Leishmanolysin-like peptidase 2	LMLN2	PE3	59	7	0	1	melanoma	QDEWGQLLLTTPAVSLSLAK	proteoform-specific
A6NHN0	Otolin-1	OTOL1	PE3	45	12	152	1	glioblastoma	GEKGDQGAMGSPGLHGGPGAK	proteoform-specific
A6NMS3	Olfactory receptor 5K4	OR5K4	PE3	17	4	1	2 (one type of biomaterial)	breast cancer	YVAICHPLQYHTMMSK	proteoform-specific
A8MZA4	Golgin subfamily A member 6-like protein 6	GOLGA6L6	PE3	8	6	2	1	prostate tissue tissue	MQEQEETMWRQEEK	proteoform-specific
C9J202	Putative glycosyltransferase ALG1L2	ALG1L2	PE3	19	3	1	1	glioblastoma	SEPEDPDTERSAFTER	proteoform-specific
C9JSJ3	Basic helix-loop-helix and HMG box domain-containing protein 1	BHMG1	PE3	57	10	3	20 (one type of biomaterial)	glioblastoma	LQELALLLPIALK	proteoform-specific
O95522	PRAME family member 12	PRAMEF12	PE3	38	21	11	3 (one type of biomaterial)	prostate tissue tissue	IIVFSTVPCPR	proteoform-specific
P0C091	FRAS1-related extracellular matrix protein 3	FREM3	PE3	151	50	24	1	melanoma	CEVTVLDALPR	proteoform-specific
P0C6C1	Ankyrin repeat domain-containing protein 34C	ANKRD34C	PE3	70	31	4	1	colon cancer	ESLDTVPSTSPSSAR	proteoform-specific
P0CG32	Zinc finger CCHC domain-containing protein 18	ZCCHC18	PE3	29	17	3	1	glioblastoma	SKEVPGEHSDASEPQ	proteoform-specific
P63123	Endogenous retrovirus group K member 18 Pro protein	ERVK-18	PE3	6	1	0	1	colon cancer	DLLQQWGAEITMTATLYSPMSQK	proteoform-specific
Q7RTU7	Basic helix-loop-helix transcription factor scleraxis	SCX	PE3	18	11	0	4 (one type of biomaterial)	colon cancer	TLIPTEPADRK	proteoform-specific
Q8NGL3	Olfactory receptor 5D14	OR5D14	PE3	9	3	2	3 (2 in one type of biomaterial)	colon cancer, Kidney cancer	MMMVLRNLSMEPTFALLGFTDYPK	proteoform-specific
Q8NGZ0	Olfactory receptor 2AJ1	OR2AJ1	PE3	15	5	0	6 (one type of biomaterial)	cardiovascular diseases	AIDHFFCEVPAMLKLSCADTTR	proteoform-specific
Q8NH73	Olfactory receptor 4S2	OR4S2	PE3	12	1	0	1	colon cancer	MIVDLLAKDK	proteoform-specific
Q9H340	Olfactory receptor 51B6	OR51B6	PE3	15	8	4	1	colon cancer	QIQSGILRLFSLPHSR	proteoform-specific
A2A368	Melanoma-associated antigen B16	MAGEB16	PE4	31	10	45	1	prostate tissue tissue	YLEYQQVANSDPARYEFLWGPR	proteoform-specific
A6NM62	Leucine-rich repeat-containing protein 53	LRRC53	PE4	133	31	0	1	virus treatment	EQNSSHAQLENK	proteoform-specific
A0A087X1C5	Putative cytochrome P450 2D7	CYP2D7	PE5	16	16	0	1	HepG2 cell line	MGLEALVPLAMIVAIFLLLVDLMHR	proteoform-specific
A0A0J9YWL9	Putative testis-expressed protein 13C	TEX13C	PE5	89	14	0	1	glioblastoma	DLVMPKEMVPLGDSNSHSLK	proteoform-specific
A6NDX5	Putative zinc finger protein 840	ZNF840P	PE5	94	5	0	1	HeLa cell line	MSLMGHGKVEMLLYAVPLLK	proteoform-specific
A6NHS1	Putative uncharacterized protein ENSP00000347057		PE5	5	3	0	1	colon cancer	TEFKEFQDFSSLPDTR	proteoform-specific
A6NK02	Putative tripartite motif-containing protein 75	TRIM75P	PE5	48	7	0	1	urine	FKVEIILDPETAHPNLIVSEDK	proteoform-specific
A8MX19	Putative protein FAM90A12P	FAM90A12P	PE5	10	8	0	1	cardiovascular diseases	EVPQAASKTHGLPQAARPQAQDK	proteoform-specific
A8MXE2	Putative UDP-GlcNAc:betaGal beta-1,3-N-acetylglucosaminyltransferase LOC100288842		PE5	32	7	0	1	colon cancer	VLHQVTPNRDPQNR	proteoform-specific
B4DYI2	Putative spermatogenesis-associated protein 31C2	SPATA31C2	PE5	29	4	0	1	kidney cancer	QLEQHMGQRGR	proteoform-specific
B5MCN3	Putative SEC14-like protein 6	SEC14L6	PE5	35	11	0	1	urine	ISYTVEVLLPDQTFMEKMEK	proteoform-specific
P0C879	Putative uncharacterized protein FLJ43185		PE5	9	1	0	1	colon cancer	AGPRPFPTPR	proteoform-specific
P0CG22	Putative dehydrogenase/reductase SDR family member 4-like 1	DHRS4L1	PE5	16	3	0	2 (one type of biomaterial)	melanoma	LAQDGAHVVVSR	proteoform-specific
Q58FG1	Putative heat shock protein HSP 90-alpha A4	HSP90AA4P	PE5	41	36	4991	1	colon cancer	MESLTDPSKLDSGK	proteoform-specific
Q66K80	Putative uncharacterized protein RUSC1-AS1	RUSC1-AS1	PE5	26	3	4	1	colon cancer	MEPGGSENAAALWISEGGRGPGR	gene-specific
Q6P2S7	Putative tetratricopeptide repeat protein 41	TTC41P	PE5	129	1	0	1	glioblastoma	SILLLSREHGCGK	gene-specific
Q6P474	Putative pyridoxal-dependent decarboxylase domain-containing protein 2	PDXDC2P	PE5	14	5	1	2 (one type of biomaterial)	colon cancer	AVPVPNMTPSAVGR	proteoform-specific
Q6ZN08	Putative zinc finger protein 66	ZNF66	PE5	55	9	989	1	colon cancer	IHTADKPYK	proteoform-specific
Q6ZUF6	Putative uncharacterized protein encoded by LINC00336	LINC00336	PE5	29	8	3	1	glioblastoma	LLSSSNPPTSASESAR	proteoform-specific
Q6ZVU0	Putative uncharacterized protein FLJ42102		PE5	17	7	0	1	virus treatment	CPSGRDHSR	proteoform-specific
Q75MW2	Protein ZNF767	ZNF767P	PE5	15	3	2	1	HeLa cell line	MEEAAAAPISPWTMAATIQAMER	gene-specific
Q8IZP2	Putative protein FAM10A4	ST13P4	PE5	11	15	1	1	cervicovaginal fluid	FDYDEDASAMLK	proteoform-specific
Q8N377	Putative uncharacterized protein LOC387726		PE5	4	2	3	1	colon cancer	QLPSSVGLACFGTAAVPR	proteoform-specific
Q8N7R0	Putative homeobox protein NANOG2	NANOGP1	PE5	5	2	2	1	colon cancer	MDLPIQDSHDSSTSPK	proteoform-specific
Q9H379	Putative uncharacterized protein PRO3102	PRO3102	PE5	9	2	0	1	HepG2 cell line	MPLASPIQHHEVTRGVAPSMALR	proteoform-specific
Q9H853	Putative tubulin-like protein alpha-4B	TUBA4B	PE5	19	9	127468	55 (6 type of biomateial)	colon cancer, ovarian cancer, cardiovascular diseases, glioblastoma, HL60 cell line, virus treatment	QIFHPEQLITGK	proteoform-specific
Q9UKY3	Putative inactive carboxylesterase 4	CES1P1	PE5	9	3	314, 98	12, 6 - all in one type of biomaterial	colon cancer	AGQLISELFTNR, AGQLISELFTNRK	proteoform-specific
