# Supplementary material for: Is It Possible to Find Needles in a Haystack? Meta-Analysis of 1000+ MS/MS Files Provided by the Russian Proteomic Consortium for Mining Missing Proteins
Source: Proteomes. 2020 May 23;8(2):12. doi: 10.3390/proteomes8020012 (PMC7356824; doi:10.3390/proteomes8020012)
Supplement: Supplementary file 1 [file proteomes-08-00012-s001.zip › suppl/suppl_table2.xlsx]

## Sheet: Лист1
List of MS-detected peptides mapping on missing and uncertain proteins
AC	Gene	Protein existence	Detected peptides	Number of theoretical unique peptides	Number of peptides observed in GPMdb	Number of peptides observed in GPMdb	Number of observations in our data	Type(s) of biological sample (number of observation of characteristic peptides for several types of samples given in brackets)	Publication of experimental data (if any)
Q8NG97	OR2Z1	PE2	MGDVNQSVASDFILVGLFSHSGSR	6	0	0	4	Melanoma biopsy	10.18632/oncotarget.22751
P0C879	N/A	PE5	AGPRPFPTPR	9	1	0	1	8 malignant melanoma cell lines	10.1021/acs.jproteome.7b00841
P35410	MAS1L	PE2	SLFLTYWKHVK	16	1	0	2	Blood plasma of the patients with breast cancer	-
P63123	ERVK-18	PE3	DLLQQWGAEITMTATLYSPMSQK	6	1	0	1	8 malignant melanoma cell lines	10.1021/acs.jproteome.7b00841
Q5H9K5_g	ZMAT1	PE2	HLSSENNTADHQAGHK	54	1	0	1	8 malignant melanoma cell lines	10.1021/acs.jproteome.7b00841
Q6P2S7_g	TTC41P	PE5	SILLLSREHGCGK	129	1	0	1	Glioblastoma biopsy	10.18632/oncotarget.22751.
Q8NH73	OR4S2	PE3	MIVDLLAKDK	12	1	0	1	8 malignant melanoma cell lines	10.1021/acs.jproteome.7b00841
Q9UKI9	POU2F3	PE2	MVNLESMHTDIK	16	1	0	1	Prostate biopsy	-
Q9Y5G5_g	PCDHGA8	PE2	VLENMPPGTR	41	1	0	1	Glioblastoma biopsy	10.18632/oncotarget.22751.
P0DP72	VSIG10L2	PE2	VDPGTSGFMLHPEGAQLR	37	2	0	1	8 malignant melanoma cell lines	10.1021/acs.jproteome.7b00841
Q5VWK0_g	NBPF6	PE2	LAFRFAGPHAESAEIPNTAER	4	2	0	1	Cardiomiocytes and adipocytes	-
Q8NG84	OR2AK2	PE2	VLIVVFQMSSGKGQAK	14	2	0	1	8 malignant melanoma cell lines	10.1021/acs.jproteome.7b00841
Q96Q91_g	SLC4A9	PE2	DYSLDYLPFR	60	2	0	1	Melanoma biopsy	10.18632/oncotarget.22751
Q9H379	PRO3102	PE5	MPLASPIQHHEVTRGVAPSMALR	9	2	0	1	HepG2 cell line	-
A6NHS1	N/A	PE5	TEFKEFQDFSSLPDTR	5	3	0	1	8 malignant melanoma cell lines	10.1021/acs.jproteome.7b00841
P0CG22	DHRS4L1	PE5	LAQDGAHVVVSR	16	3	0	2	Melanoma biopsy	10.18632/oncotarget.22751
Q8WZ79	DNASE2B	PE2	SEQLMNDTKSVLGR	38	3	0	1	CACO cell line	-
Q9UQ74	PSG8	PE2	IPVSLAIGI	15	3	0	1	Melanoma biopsy	10.18632/oncotarget.22751
B4DYI2	SPATA31C2	PE5	QLEQHMGQRGR	29	4	0	1	Blood plasma of the patients with kidney cancer	-
Q9Y5Y3	GPR45	PE2	EACIELLPQTFQILPK	17	4	0	1	8 malignant melanoma cell lines	10.1021/acs.jproteome.7b00841
A6NDX5	ZNF840P	PE5	MSLMGHGKVEMLLYAVPLLK	94	5	0	1	EAhy cell line	-
A8K0S8	MEIS3P2	PE2	RMVQPMIDQSNR	12	5	0	1	Blood plasma of the patients with breast cancer	-
Q6ZVT6_g	C3orf67	PE2	CVNGTEMSALLIPESEEQGNK	53	5	0	1	Cardiomiocytes and adipocytes	-
Q8NGZ0	OR2AJ1	PE3	AIDHFFCEVPAMLKLSCADTTR	15	5	0	6	Cardiomiocytes and adipocytes	-
Q5TA89	HES5	PE2	INSSIEQLK	18	6	0	1	Melanoma biopsy	10.18632/oncotarget.22751
A0A1B0GTW7	LMLN2	PE3	QDEWGQLLLTTPAVSLSLAK	59	7	0	1	Melanoma biopsy	10.18632/oncotarget.22751
A6NK02	TRIM75P	PE5	FKVEIILDPETAHPNLIVSEDK	48	7	0	1	Urine	-
A8MXE2	N/A	PE5	VLHQVTPNRDPQNR	32	7	0	1	8 malignant melanoma cell lines	10.1021/acs.jproteome.7b00841
F5GYI3	UBAP1L	PE2	LWEQFSDMGFQQDR	21	7	0	1	HepG2 cell line	10.3390/proteomes5040033
Q6ZVU0	N/A	PE5	CPSGRDHSR	17	7	0	1	Stem and non-stem cell of patients with colorectal cancer	-
Q8IXR9_g	C12orf56	PE2	FLFPFHHTK	66	7	0	1	Cervicovaginal fluid	10.1002/jms.4374
Q9NYP8	C21orf62	PE2	SYSIENVTSIANNFPDFSYFR	19	7	0	1	Glioblastoma biopsy	10.18632/oncotarget.22751.
A8MX19	FAM90A12P	PE5	EVPQAASKTHGLPQAARPQAQDK	10	8	0	1	Cardiomiocytes and adipocytes	-
O43345_g	ZNF208	PE2	CEECGKAFSWPSR	95	8	0	7	Umbilical cord blood	-
A0PJE2-3	DHRS12	PE2	VVGEAQTASPLPRFLEIMMHEGK	31	9	0	1	Cardiomiocytes and adipocytes	-
Q6S9Z5	ZNF474	PE2	VIHATQDALGEPGGALCL	36	9	0	1	8 malignant melanoma cell lines	10.1021/acs.jproteome.7b00841
A6NFE2	SMCO2	PE2	GMFLKLNYWNTK	39	10	0	2	Liver tissue	10.1016/j.dib.2017.04.051
B5MCN3	SEC14L6	PE5	ISYTVEVLLPDQTFMEKMEK	35	11	0	1	Urine	-
Q7RTU7	SCX	PE3	TLIPTEPADRK	18	11	0	4	8 malignant melanoma cell lines	10.1021/acs.jproteome.7b00841
Q8N119	MMP21	PE2	MWSEVTPLDFR	63	11	0	2	Cardiomiocytes and adipocytes	-
Q96CB5	C8orf44	PE2	GFWSLLFSNLGRF	20	11	0	1	HepG2 cell line	10.3390/proteomes5040033
Q5T5N4	C6orf118	PE2	VLCYQEAGSR	54	12	0	1	HL60 cell line	-
A0A0J9YWL9	TEX13C	PE5	DLVMPKEMVPLGDSNSHSLK	89	14	0	1	Glioblastoma biopsy	10.18632/oncotarget.22751.
Q6ZSI9	CAPN12	PE2	KEDGEFWMELR	50	14	0	2	Blood plasma of patients with ovarian cancer	-
Q3KNW1	SNAI3	PE2	IEEALGASGLDALEVSEVDPRASR	39	15	0	1	HepG2 cell line	10.3390/proteomes5040033
Q6ZMV8	ZNF730	PE2	LFCILSHLAQHKK	39	15	0	1	8 malignant melanoma cell lines	10.1021/acs.jproteome.7b00841
Q9BXX2_g	ANKRD30B	PE2	GPEPPNPFSERVYTEK	145	15	0	2	Prostate biopsy	-
A0A087X1C5	CYP2D7	PE5	MGLEALVPLAMIVAIFLLLVDLMHR	16	16	0	1	HepG2 cell line	-
A6NCI4	VWA3A	PE2	DLIIHFITYR	118	17	0	1	Prostate biopsy	-
Q6ZRR7_g	LRRC9	PE2	EISGLEPCLQLK	153	17	0	1	Glioblastoma biopsy	10.18632/oncotarget.22751.
Q16099	GRIK4	PE2	DDKTATIIIHANASMSHTILLK	62	20	0	1	Cervicovaginal fluid	10.1002/jms.4374
Q16280	CNGA2	PE2	FRGPELQTVTTQEGDGK	56	21	0	1	8 malignant melanoma cell lines	10.1021/acs.jproteome.7b00841
Q86V71	ZNF429	PE2	CDECGKTFSISSTFTK	61	21	0	1	Glioblastoma biopsy	10.18632/oncotarget.22751.
A6NIK2	LRRC10B	PE2	RPARAFEDEEEEDLLIGGAGSR	47	28	0	1	Urine	-
A6NM62	LRRC53	PE4	EQNSSHAQLENK	133	31	0	1	Stem and non-stem cell of patients with colorectal cancer	-
Q6ZUA9	MROH5	PE2	LGAQGTGSQSLGVAISTR	130	37	0	2	Prostate biopsy	-
A4D1E1	ZNF804B	PE2	RCLFGNQVLQTSSDLSNANHR, TMIANPDWEK	130	42	0	3	Urine (2); Cardiomiocytes and adipocytes (1)	-
Q5HY64	FAM47C	PE2	TRMYSLRPEPPNTGVSHLCPEPPK	78	46	0	1	Chorion tissue	-
Q96M78	FER1L6-AS2	PE2	EELHLLHFPNSPEENLRK	10	1	1	1	8 malignant melanoma cell lines	10.1021/acs.jproteome.7b00841
C9J202	ALG1L2	PE3	SEPEDPDTERSAFTER	19	3	1	1	Glioblastoma biopsy	10.18632/oncotarget.22751.
Q6ZNR0	TMEM91	PE2	GDIQGAGAASRR	6	3	1	1	HepG2 cell line	10.3390/proteomes5040033
Q8TDI7_g	TMC2	PE2	DIESHFGSSVASYFIFLR	63	3	1	2	Blood plasma of patients with ovarian cancer	-
A6NMS3	OR5K4	PE3	YVAICHPLQYHTMMSK	17	4	1	2	Blood plasma of the patients with breast cancer	-
Q5EBN2	TRIM61	PE2	MEFVTALADLRAEASCPICLDYLK	23	5	1	4	Blood plasma of patients with chronic cerebral ischemia	10.1007/s12031-018-1040-3
Q6P387_g	C16orf46	PE2	DGCVAYAYGLK	43	5	1	2	Blood plasma of patients with ovarian cancer	-
Q6P474	PDXDC2P	PE5	AVPVPNMTPSAVGR	14	5	1	2	8 malignant melanoma cell lines	10.1021/acs.jproteome.7b00841
H3BQW9	FAM229A	PE2	GLDMSAQEPPQGR	10	7	1	1	8 malignant melanoma cell lines	10.1021/acs.jproteome.7b00841
Q8IXS0	FAM217A	PE2	NLPAGRDGAAGGK	49	15	1	1	8 malignant melanoma cell lines	10.1021/acs.jproteome.7b00841
Q8IZP2	ST13P4	PE5	FDYDEDASAMLK	11	15	1	1	Cervicovaginal fluid	10.1002/jms.4374
P0CG24	ZNF883	PE2	IHTRERPYQCTK	44	21	1	2	Blood plasma of patients with ovarian cancer	-
A6NNA2	SRRM3	PE2	HWSSSSASPPPKK	58	23	1	1	Melanoma biopsy	10.18632/oncotarget.22751
Q86SP6	GPR149	PE2	QNAYAVASDGKK	47	23	1	1	Cardiomiocytes and adipocytes	-
Q8N7R0	NANOGP1	PE5	MDLPIQDSHDSSTSPK	5	2	2	1	8 malignant melanoma cell lines	10.1021/acs.jproteome.7b00841
A8MVX0_g	ARHGEF33	PE2	LEAAAQAHGK	86	3	2	2	8 malignant melanoma cell lines (1); CACO cell line (1)	10.1021/acs.jproteome.7b00841 (8 cell lines)
F8W1W9	NPIPB9	PE2	MPMRVPEEVTLR	8	3	2	8	Blood plasma of patients with ovarian cancer	-
Q75MW2_g	ZNF767P	PE5	MEEAAAAPISPWTMAATIQAMER	15	3	2	1	EAhy cell line	-
Q8NGL3	OR5D14	PE3	MMMVLRNLSMEPTFALLGFTDYPK	9	3	2	3	Blood plasma of the patients with kidney cancer (2); blood plasma of patients with colorectal cancer (1)	-
Q9N2J8	N/A	PE2	ELPVPLMTLTPQK	12	3	2	1	8 malignant melanoma cell lines	10.1021/acs.jproteome.7b00841
Q96HZ4-3	HES6	PE2	LLLAGAEAK	16	5	2	1	Liver tissue	10.1016/j.dib.2017.04.051
A8MZA4	GOLGA6L6	PE3	MQEQEETMWRQEEK	8	6	2	1	Prostate biopsy	-
Q5VVC0	C1orf146	PE2	ECLLSTEEIFLAK	18	6	2	2	8 malignant melanoma cell lines	10.1021/acs.jproteome.7b00841
Q7L0R7_g	RNF44	PE2	MPLQRLDNDVDLR	17	6	2	1	Prostate biopsy	-
Q6ZSN1	N/A	PE2	GVPPPPAIGVLIAR	23	7	2	1	8 malignant melanoma cell lines	10.1021/acs.jproteome.7b00841
P58512-3	LINC01547	PE2	RNVDNNPGCLCVPS	22	8	2	1	8 malignant melanoma cell lines	10.1021/acs.jproteome.7b00841
Q6ZRT6	PRR23B	PE2	VPLDDVDLVLEPAPTSILR	12	9	2	1	HL60 cell line	-
Q9Y5P1	OR51B2	PE2	YASILTNTRVIALGVGVFLR	13	10	2	1	8 malignant melanoma cell lines	10.1021/acs.jproteome.7b00841
A6NGH8	ANKRD61	PE2	LLGAGVSCIR	38	14	2	2	HepG2 cell line	10.3390/proteomes5040033
Q9NQ03	SCRT2	PE2	AYVSMPALAMHLLTHNLRHK	21	19	2	2	Cardiomiocytes and adipocytes	-
Q93098	WNT8B	PE2	ELVHLEDSPDYCLENK	34	20	2	1	EAhy cell line	-
Q6IEE8_g	SLFN12L	PE2	FLGVYDKGR	51	1	3	1	Liver tissue	10.1016/j.dib.2017.04.051
Q2VPJ9_g	LRRC75B	PE2	RAGPEAGSEAGAAAGCGPAPYER	19	2	3	1	HepG2 cell line	10.3390/proteomes5040033
Q8N377	N/A	PE5	QLPSSVGLACFGTAAVPR	4	2	3	1	8 malignant melanoma cell lines	10.1021/acs.jproteome.7b00841
Q8N1X5	N/A	PE2	CGSDSTPPPPLPRR	12	3	3	1	Cardiomiocytes and adipocytes	-
Q96LL3	C16orf92	PE2	NWVPSQLPPREIK	11	3	3	1	8 malignant melanoma cell lines	10.1021/acs.jproteome.7b00841
Q9NUZ1_g	ACOXL	PE2	LMPHLATALALTFVSR	62	3	3	1	Stem and non-stem cell of patients with colorectal cancer	-
Q6ZUF6	LINC00336	PE5	LLSSSNPPTSASESAR	29	8	3	1	Glioblastoma biopsy	10.18632/oncotarget.22751
C9JSJ3	BHMG1	PE3	LQELALLLPIALK	57	10	3	20	8 malignant melanoma cell lines	10.1021/acs.jproteome.7b00841
Q6ZWK6	TMPRSS11F	PE2	KDVYDGLITPGMLCAGFMEGK	41	12	3	1	Blood plasma of the patients with kidney cancer	-
P0CG32	ZCCHC18	PE3	SKEVPGEHSDASEPQ	29	17	3	1	Glioblastoma biopsy	10.18632/oncotarget.22751
Q66K80_g	RUSC1-AS1	PE5	MEPGGSENAAALWISEGGRGPGR	26	3	4	1	8 malignant melanoma cell lines	10.1021/acs.jproteome.7b00841
Q8NFQ6_g	BPIFC	PE2	LALPESNRSNIEVLR	24	5	4	1	Placenta tissue	-
Q9H340	OR51B6	PE3	QIQSGILRLFSLPHSR	15	8	4	1	8 malignant melanoma cell lines	10.1021/acs.jproteome.7b00841
O00341_g	SLC1A7	PE2	MMILPLVVSSLMSGLASLDAK	29	10	4	2	Blood plasma	-
Q96HZ4-2	HES6	PE2	GSLPPTLGPR	32	10	4	3	HepG2 cell line	10.3390/proteomes5040033
Q96M66	N/A	PE2	DTGEPSALPVQGRAEGR	26	15	4	1	Melanoma biopsy	10.18632/oncotarget.22751
P0C6C1	ANKRD34C	PE3	ESLDTVPSTSPSSAR	70	31	4	1	8 malignant melanoma cell lines	10.1021/acs.jproteome.7b00841
Q9H3W5	LRRN3	PE2	FMEPDSLFCVDPPEFQGQNVR	57	32	4	1	Urine	-
Q8N812	C12orf76	PE2	CCLPCDLGQASRFIHTTVCSAIR	11	9	7	1	HL60 cell line	-
Q9Y5I0_g	PCDHA13	PE2	EDTQPSAIIALISVSDR	24	1	8	6	Glioblastoma biopsy	10.18632/oncotarget.22751
Q3KRB8	ARHGAP11B	PE2	LVKLALLQHLR	11	12	8	2	8 malignant melanoma cell lines (1); Glioblastoma biopsy (1)	10.1021/acs.jproteome.7b00841 (8 cell lines); 10.18632/oncotarget.22751 (glioblastoma)
Q12870	TCF15	PE2	AAGSAKGAVPAAADGGR	23	15	9	1	8 malignant melanoma cell lines	10.1021/acs.jproteome.7b00841
Q5M9Q1	NKAPL	PE2	IGELGAPEVWGPSPK	32	24	9	1	8 malignant melanoma cell lines	10.1021/acs.jproteome.7b00841
Q86UP9	LHFPL3	PE2	QDSLMAEELK	10	3	10	1	CACO cell line	-
A0A075B6N3	TRBV24-1	PE3	QDPGLGLQLIYYSFDVK	11	6	11	1	Blood plasma of patients with ovarian cancer	-
O95522	PRAMEF12	PE3	IIVFSTVPCPR	38	21	11	3	Prostate biopsy	-
Q8N1M1_g	BEST3	PE2	NLQVSLLAVDEMHMSLPKMK	48	1	14	4	Cervicovaginal fluid	10.1002/jms.4374
Q8N9C0_g	IGSF22	PE2	EPAEGDPPSGYILEMR	92	18	15	1	8 malignant melanoma cell lines	10.1021/acs.jproteome.7b00841
A4QPB2_g	LRP5L	PE2	INDPDDIAVNWVAR	22	2	16	5	Liver tissue	10.1016/j.dib.2017.04.051
Q8NFD2	ANKK1	PE2	QGIMSFLEGK	60	32	17	1	Blood plasma of patients with chronic cerebral ischemia	10.1007/s12031-018-1040-3
Q8N4B4	FBXO39	PE2	LARILLQEIPIR	47	14	18	9	8 malignant melanoma cell lines	10.1021/acs.jproteome.7b00841
Q6PXP3	SLC2A7	PE2	GDEATARQALR	27	16	21	12	8 malignant melanoma cell lines	10.1021/acs.jproteome.7b00841
Q9GZW8_g	MS4A7	PE2	MLLQSQTMGVSHSFTPK	4	2	24	1	Stem and non-stem cell of patients with colorectal cancer	-
Q11128	FUT5	PE2	DDATGSPRPGLMAVEPVTGAPNGSR	8	16	24	1	Umbilical cord blood	-
P0C091	FREM3	PE3	CEVTVLDALPR	151	50	24	1	Melanoma biopsy	10.18632/oncotarget.22751
P34995	PTGER1	PE2	LALAAVAAVALAVALLPLAR	20	14	25	3	8 malignant melanoma cell lines	10.1021/acs.jproteome.7b00841
A6NDY0_g	PABPN1L	PE2	EILGPEGGEGK	18	11	28	1	Blood plasma of patients with ovarian cancer	-
A9Z1Z3_g	FER1L4	PE2	AEPEPPQAQQGSTLSR	153	6	30	2	Blood plasma of the patients with CVD (1); Glioblastoma biopsy (1)	10.1021/acs.jproteome.7b00841 (8 cell lines); 10.18632/oncotarget.22751 (glioblastoma)
Q8NFN8_g	GPR156	PE2	GDQVPMNPSQSLLPER	49	1	34	3	8 malignant melanoma cell lines (2); Glioblastoma biopsy (1)	10.1021/acs.jproteome.7b00841 (8 cell lines); 10.18632/oncotarget.22751 (glioblastoma)
Q8NHE4_g	ATP6V0E2	PE2	DPDPQGLPGSWK	1	1	38	1	Cardiomiocytes and adipocytes	-
Q8NAV2_g	C8orf58	PE2	IQRPPGDPGEEESTR	38	2	42	1	8 malignant melanoma cell lines	10.1021/acs.jproteome.7b00841
A2A368	MAGEB16	PE4	YLEYQQVANSDPARYEFLWGPR	31	10	45	1	Prostate biopsy	-
P60606	CTXN1	PE2	MPASSWTDHKEALER	7	5	93	1	8 malignant melanoma cell lines	10.1021/acs.jproteome.7b00841
O95626	ANP32D	PE2	CPNLIHLNLSGNK	11	8	98	2	Liver tissue	10.1016/j.dib.2017.04.051
A6NHN0	OTOL1	PE3	GEKGDQGAMGSPGLHGGPGAK	45	12	152	1	Glioblastoma biopsy	10.18632/oncotarget.22751
Q9Y5K1_g	SPO11	PE2	SLHILSTSKGLIAGNLR	45	1	389	1	8 malignant melanoma cell lines	10.1021/acs.jproteome.7b00841
Q6ZN08	ZNF66	PE5	IHTADKPYK	55	9	989	1	8 malignant melanoma cell lines	10.1021/acs.jproteome.7b00841
Q8TBE1	CNIH3	PE2	SPIDQCNPVHAR	5	3	1714	1	Glioblastoma biopsy	10.18632/oncotarget.22751
Q58FG1	HSP90AA4P	PE5	MESLTDPSKLDSGK	41	36	4991	2	HepG2 cell line (1); 8 malignant melanoma cell lines (1)	10.1021/acs.jproteome.7b00841 (8 cell lines)
Q8TD47	RPS4Y2	PE2	ISNIFVIGNGNKPWISLPR	19	14	5374	1	Melanoma biopsy	10.18632/oncotarget.22751
A0A087WSY6	IGKV3D-15	PE3	LLIYGASIR	2	1	5777	50	Blood plasma of patients with ovarian cancer	?
A0A0A0MT36	IGKV6D-21	PE3	YASQSISGVPSR	3	1	6126	5	Blood plasma of patients with ovarian cancer	?
Q9H853	TUBA4B	PE5	QIFHPEQLITGK	19	9	127468	55	Melanoma biopsy (1); Glioblatoma (2); HL60 cell line (3); Stem and non-stem cell of patients with colorectal cancer (1); 8 malignant melanoma cell lines (49)	10.18632/oncotarget.22751 (melanoma biopsy); 10.1021/acs.jproteome.7b00841 (8 cell lines)
A6NKB5	PCNX2	PE2	NPSNNRQIHNGK, KHHPWMWISHPILK	132	25	0, 0	2	Cervicovaginal fluid (1); Glioblastoma (1)	10.1002/jms.4374 (cvf); 10.18632/oncotarget.22751 (glioblastoma)
P83859	QRFP	PE2	QDEGSEATGFLPAAGEK, TSGPLGNLAEELNGYSR	15	7	0, 3	5	8 malignant melanoma cell lines (4); Prostate biopsy (1)	10.1021/acs.jproteome.7b00841 (8 cell lines)
A0AVI2	FER1L5	PE2	ERFIGLATVLLKPLLK, RLLLDIDINK, WLGLCQPNNPGSGVTGYLK	207	28	1, 15, 0	4	8 malignant melanoma cell lines (1); Stem and non-stem cell of patients with colorectal cancer (1); Cardiomiocytes and adipocytes (1)	10.1021/acs.jproteome.7b00841 (8 cell lines)
P0C7T8	TMEM253	PE2	EQTRAALLPP, MEDRAGEQEQER	6	2	10, 9	4	Liver tissue (3); 8 malignant melanoma cell lines (1)	10.1021/acs.jproteome.7b00841 (8 cell lines)
Q8N326	C10orf111	PE2	HMPMGNNAGNLEPEKR, NLDLLIYPWPELR	16	8	18, 1	3	Glioblastoma biopsy (1); Blood plasma of the patients with CVD (2)	10.18632/oncotarget.22751 (glioblastoma)
A6NJ46_g	NKX6-3	PE2	HRAAFSVLSLGAHSV, SALEPSSSTPRAPGGAGAGAGGDR	20	11	20, 8	2	8 malignant melanoma cell lines	10.1021/acs.jproteome.7b00841
Q9UKY3	CES1P1	PE5	AGQLISELFTNR, AGQLISELFTNRK	9	3	314, 98	12	8 malignant melanoma cell lines	10.1021/acs.jproteome.7b00841
Q8N7P7	N/A	PE2	LSPQTGIPR, NPGDDGCLLKQGPR	44	6	5, 2	8	Blood plasma of the patients with CVD (1); Melanoma biopsy (3); HepG2 cell line (3); HL60 cell line (3)	10.18632/oncotarget.22751 (melanoma biopsy)
